# Supplementary material for: The influence of reservoir traits on carbon dioxide emissions in the Belo Monte hydropower complex, Xingu River, Amazon – Brazil
Source: Copernicus journal article supplement (doi:10.5194/bg-2019-53), 2019-02-18
Supplement: Supplementary file [file bg-2019-53-AC2-supplement.pdf]

## Supplementary Material

# The influence of reservoir traits on carbon dioxide emissions in the Belo Monte hydropower complex, Xingu River, Amazon – Brazil

Kleiton R. Araújo<sup>1\*</sup>, Henrique O. Sawakuchi<sup>2-3</sup>, Dailson J. Bertassoli Jr.<sup>4</sup>, André O. Sawakuchi<sup>1,4</sup>, Karina D. da Silva<sup>1,5</sup>, Thiago V. Bernardi<sup>1,5</sup>, Nicholas D. Ward<sup>6-7</sup>, Tatiana S. Pereira<sup>1,5</sup>.

<sup>1</sup>Programa de Pós Graduação em Biodiversidade e Conservação, Universidade Federal do Pará, Altamira, 68372 – 040, Brazil,

<sup>2</sup>Centro de Energia Nuclear na Agricultura, Universidade de São Paulo, Piracicaba, Brazil,

<sup>3</sup>Department of Ecology and Environmental Science, Umeå University, Umeå, SE-901 87, Sweden,

<sup>4</sup>Instituto de Geociências, Universidade de São Paulo, São Paulo, Brazil,

<sup>5</sup>Faculdade de Ciências Biológicas, Universidade Federal do Pará, Altamira, 68372 – 040, Brazil,

<sup>6</sup>Marine Sciences Laboratory, Pacific Northwest National Laboratory, Sequim, Washington, 98382, USA,

<sup>7</sup>School of Oceanography, University of Washington, Seattle, Washington, 98195-5351, USA.

\*Correspondence to: Kleiton R. Araújo ([kleitonrabelo@rocketmail.com](mailto:kleitonrabelo@rocketmail.com))

Keywords: run-of-the-river reservoir; greenhouse gas emission; tropical river damming.

32 **1. Sampling details**

33 Based on visualization in Google Earth we estimate that the maximum distance  
34 drifted may be approximately 1 km for measurements in the river channel up  
35 and downstream of the reservoirs. In sheltered areas located in bays and over  
36 islands with standing trees, where the water flow was very low, drifting was very  
37 short and caused by wind. An estimate of the drifting distance in the natural  
38 river channel and in the main channel of the Xingu Reservoir was obtained by  
39 using the average water velocity measured by the National Water Agency of  
40 Brazil at the Altamira station. We separated the historical values into before and  
41 after 2016, when the dams was completed. Therefore, representing estimates  
42 of water velocity in the natural river (between 2005 and 2016), and in the Xingu  
43 Reservoir main channel (after 2016). The average water velocities at Altamira  
44 are 0.74 and 0.24 m s<sup>-1</sup> for before and after the dam, respectively. Assuming  
45 that there is no resistance of the boat with the water or air, drifting speed is  
46 similar to the water velocity. The total time of deployment was up to 30 minutes  
47 for the three consecutive measurements. Based on these we found that in the  
48 main channel of the Xingu Reservoir the drifting distance would be 432 m, and  
49 1332 m for the natural river channel up and downstream the reservoirs.

50 **2. Depth profiles**

51 During high water of 2016 and 2017 we registered depth profiles for physical-  
52 chemical variables through whole sampling area. We measured water column  
53 pH, depth, dissolved oxygen (DO), conductivity and temperature using a  
54 multiparameter probe (EXO2®, YSI). The depth profiles were registered until  
55 near bottom depth (approximately 80 % of total depth) to avoid sediment  
56 interaction. Total depths are listed on table 1 of the manuscript. Depth profile  
57 tables are presented by year and flow order, respectively.

58 Table S1 – P1 site depth profile from 2016 campaign.

| pH   | ODO mg/L | Temp °C | Cond µS/cm | Depth m |
|------|----------|---------|------------|---------|
| 6.65 | 6.43     | 29.208  | 23.5       | 0.166   |
| 6.61 | 6.43     | 29.208  | 23.5       | 0.212   |
| 6.53 | 6.43     | 29.208  | 23.5       | 0.265   |
| 6.5  | 6.43     | 29.201  | 23.5       | 0.283   |
| 6.5  | 6.43     | 29.195  | 23.5       | 0.401   |

|      |      |        |      |        |
|------|------|--------|------|--------|
| 6.55 | 6.42 | 29.195 | 23.5 | 0.678  |
| 6.6  | 6.41 | 29.184 | 23.5 | 1.046  |
| 6.56 | 6.41 | 29.191 | 23.5 | 1.416  |
| 6.61 | 6.4  | 29.209 | 23.5 | 1.787  |
| 6.62 | 6.4  | 29.207 | 23.5 | 2.171  |
| 6.63 | 6.4  | 29.217 | 23.5 | 2.614  |
| 6.63 | 6.4  | 29.198 | 23.5 | 2.831  |
| 6.63 | 6.4  | 29.191 | 23.5 | 3.039  |
| 6.62 | 6.39 | 29.2   | 23.5 | 4.061  |
| 6.64 | 6.4  | 29.213 | 23.5 | 4.165  |
| 6.64 | 6.39 | 29.205 | 23.5 | 4.359  |
| 6.64 | 6.38 | 29.211 | 23.5 | 4.723  |
| 6.63 | 6.38 | 29.203 | 23.5 | 5.145  |
| 6.65 | 6.37 | 29.205 | 23.5 | 5.632  |
| 6.69 | 6.37 | 29.209 | 23.5 | 6.042  |
| 6.65 | 6.37 | 29.203 | 23.5 | 6.453  |
| 6.63 | 6.37 | 29.202 | 23.5 | 7.633  |
| 6.66 | 6.37 | 29.2   | 23.5 | 8.006  |
| 6.62 | 6.37 | 29.198 | 23.5 | 9.085  |
| 6.61 | 6.36 | 29.198 | 23.5 | 9.492  |
| 6.61 | 6.36 | 29.198 | 23.5 | 10.793 |
| 6.62 | 6.35 | 29.197 | 23.5 | 11.27  |
| 6.6  | 6.35 | 29.198 | 23.5 | 12.4   |
| 6.56 | 6.34 | 29.2   | 23.5 | 12.796 |
| 6.59 | 6.34 | 29.198 | 23.5 | 13.738 |
| 6.56 | 6.33 | 29.2   | 23.5 | 14.053 |
| 6.56 | 6.33 | 29.199 | 23.5 | 15.073 |
| 6.58 | 6.32 | 29.198 | 23.5 | 15.3   |

59

60 Table S2 – P6 site depth profile from 2016 campaign.

| pH   | ODO mg/L | Temp °C | Cond µS/cm | Depth m |
|------|----------|---------|------------|---------|
| 6.09 | 4.99     | 29.761  | 21.9       | 0.397   |
| 6.04 | 3.95     | 29.568  | 22.3       | 0.759   |
| 5.97 | 3.72     | 29.495  | 22.5       | 1.075   |
| 5.97 | 3.86     | 29.422  | 22.3       | 1.373   |
| 6.01 | 3.88     | 29.426  | 22.4       | 1.494   |
| 6.05 | 3.82     | 29.438  | 22.4       | 1.453   |
| 6.11 | 3.77     | 29.449  | 22.4       | 1.383   |
| 6.16 | 3.8      | 29.448  | 22.4       | 1.377   |
| 6.15 | 3.86     | 29.435  | 22.3       | 1.382   |
| 6.15 | 3.87     | 29.44   | 22.4       | 1.378   |
| 6.14 | 3.86     | 29.445  | 22.4       | 1.359   |

|      |      |        |      |       |
|------|------|--------|------|-------|
| 6.14 | 3.82 | 29.456 | 22.5 | 1.344 |
| 6.12 | 3.75 | 29.462 | 22.5 | 1.343 |

61

62 Table S3 – P7 site depth profile from 2016 campaign.

| pH   | ODO mg/L | Temp °C | Cond µS/cm | Depth m |
|------|----------|---------|------------|---------|
| 6.72 | 7.04     | 29.555  | 21.6       | 0.102   |
| 6.67 | 7.03     | 29.538  | 21.6       | 0.223   |
| 6.64 | 7.02     | 29.518  | 21.6       | 1.222   |
| 6.68 | 7.02     | 29.508  | 21.6       | 1.279   |
| 6.74 | 7        | 29.473  | 21.6       | 1.411   |
| 6.73 | 7        | 29.48   | 21.6       | 1.602   |
| 6.75 | 6.99     | 29.467  | 21.6       | 1.803   |
| 6.8  | 6.99     | 29.468  | 21.6       | 1.965   |
| 6.83 | 6.99     | 29.475  | 21.6       | 2.167   |
| 6.82 | 6.99     | 29.48   | 21.6       | 2.351   |
| 6.8  | 6.99     | 29.475  | 21.6       | 2.538   |
| 6.79 | 6.98     | 29.466  | 21.6       | 2.767   |
| 6.79 | 6.99     | 29.487  | 21.6       | 3.018   |
| 6.83 | 6.98     | 29.482  | 21.6       | 3.283   |
| 6.85 | 6.99     | 29.492  | 21.6       | 3.546   |
| 6.85 | 6.98     | 29.483  | 21.6       | 3.825   |
| 6.86 | 6.98     | 29.482  | 21.6       | 4.102   |
| 6.82 | 6.98     | 29.478  | 21.6       | 4.379   |
| 6.8  | 6.97     | 29.476  | 21.6       | 4.656   |
| 6.84 | 6.97     | 29.471  | 21.6       | 4.966   |
| 6.84 | 6.97     | 29.481  | 21.6       | 5.29    |
| 6.82 | 6.97     | 29.484  | 21.6       | 5.6     |
| 6.83 | 6.97     | 29.482  | 21.6       | 5.958   |
| 6.82 | 6.96     | 29.477  | 21.6       | 7.127   |
| 6.78 | 6.96     | 29.48   | 21.6       | 7.444   |
| 6.77 | 6.95     | 29.479  | 21.6       | 8.549   |
| 6.77 | 6.95     | 29.477  | 21.6       | 8.913   |
| 6.8  | 6.94     | 29.479  | 21.6       | 9.249   |
| 6.82 | 6.94     | 29.476  | 21.6       | 10.418  |
| 6.82 | 6.94     | 29.476  | 21.6       | 10.691  |
| 6.79 | 6.93     | 29.477  | 21.6       | 10.904  |

63

64 Table S4 – P8 site depth profile from 2016 campaign.

| pH   | ODO mg/L | Temp °C | Cond µS/cm | Depth m |
|------|----------|---------|------------|---------|
| 6.48 | 6.84     | 30.409  | 24.3       | 0.143   |

|      |      |        |      |       |
|------|------|--------|------|-------|
| 6.48 | 6.8  | 30.408 | 24.3 | 0.286 |
| 6.51 | 6.82 | 30.415 | 24.3 | 0.296 |
| 6.54 | 6.8  | 30.415 | 24.3 | 0.327 |
| 6.57 | 6.79 | 30.418 | 24.3 | 0.345 |
| 6.58 | 6.81 | 30.422 | 24.3 | 0.341 |
| 6.59 | 6.83 | 30.416 | 24.3 | 0.331 |
| 6.6  | 6.81 | 30.417 | 24.3 | 0.33  |
| 6.61 | 6.79 | 30.417 | 24.3 | 0.32  |
| 6.63 | 6.79 | 30.416 | 24.3 | 0.319 |
| 6.66 | 6.8  | 30.413 | 24.3 | 0.32  |
| 6.7  | 6.81 | 30.42  | 24.3 | 0.324 |
| 6.7  | 6.82 | 30.419 | 24.3 | 0.318 |
| 6.7  | 6.8  | 30.416 | 24.3 | 0.308 |
| 6.7  | 6.8  | 30.424 | 24.3 | 0.303 |

65

66 Table S5 – P12 site depth profile from 2016 campaign.

| pH   | ODO mg/L | Temp °C | Cond µS/cm | Depth m |
|------|----------|---------|------------|---------|
| 6.33 | 6.13     | 29.803  | 22.5       | 0.184   |
| 6.3  | 6.05     | 29.83   | 22.5       | 0.44    |
| 6.3  | 6.06     | 29.988  | 22.5       | 0.622   |
| 6.32 | 5.96     | 29.594  | 22.4       | 1.542   |
| 6.34 | 5.89     | 29.498  | 22.4       | 1.814   |
| 6.35 | 5.83     | 29.454  | 22.3       | 2.055   |
| 6.36 | 5.78     | 29.421  | 22.3       | 2.419   |
| 6.37 | 5.76     | 29.406  | 22.3       | 2.819   |
| 6.36 | 5.74     | 29.401  | 22.3       | 3.071   |
| 6.36 | 5.72     | 29.395  | 22.3       | 3.312   |
| 6.37 | 5.7      | 29.391  | 22.3       | 3.56    |
| 6.39 | 5.68     | 29.386  | 22.3       | 3.897   |
| 6.38 | 5.64     | 29.367  | 22.3       | 4.283   |
| 6.39 | 5.62     | 29.357  | 22.4       | 4.738   |
| 6.39 | 5.61     | 29.353  | 22.3       | 5.037   |
| 6.39 | 5.61     | 29.355  | 22.3       | 5.104   |
| 6.4  | 5.62     | 29.372  | 22.3       | 4.896   |
| 6.43 | 5.63     | 29.377  | 22.4       | 4.701   |
| 6.45 | 5.64     | 29.383  | 22.4       | 4.531   |

67

68 Table S6 – P15 site depth profile from 2016 campaign.

| pH | ODO mg/L | Temp °C | Cond µS/cm | Depth m |
|----|----------|---------|------------|---------|
|----|----------|---------|------------|---------|

|      |      |        |      |       |
|------|------|--------|------|-------|
| 6.44 | 6.47 | 29.516 | 22.6 | 0.969 |
| 6.39 | 6.44 | 29.529 | 22.6 | 2.615 |
| 6.41 | 6.43 | 29.526 | 22.6 | 3.157 |
| 6.45 | 6.42 | 29.527 | 22.5 | 4.641 |
| 6.47 | 6.41 | 29.527 | 22.6 | 6.059 |
| 6.49 | 6.4  | 29.527 | 22.6 | 7.644 |
| 6.68 | 6.39 | 29.528 | 22.6 | 8.447 |
| 6.66 | 6.36 | 29.528 | 22.6 | 8.707 |
| 6.65 | 6.37 | 29.528 | 22.6 | 8.926 |

69

70 Table S7 – P11 site depth profile from 2016 campaign.

| pH   | ODO mg/L | Temp °C | Cond µS/cm | Depth m |
|------|----------|---------|------------|---------|
| 6.3  | 6.58     | 29.444  | 17.5       | 1.43    |
| 6.3  | 6.45     | 29.451  | 22.6       | 3.677   |
| 6.34 | 6.42     | 29.458  | 22.6       | 7.086   |
| 6.39 | 6.39     | 29.455  | 22.6       | 9.411   |
| 6.46 | 6.36     | 29.433  | 22.7       | 12.642  |
| 6.53 | 6.35     | 29.423  | 22.7       | 15.238  |
| 6.54 | 6.33     | 29.422  | 22.7       | 19.197  |
| 6.55 | 6.27     | 29.413  | 23         | 20.501  |
| 6.6  | 6.26     | 29.411  | 22.8       | 20.59   |
| 6.64 | 6.25     | 29.411  | 22.8       | 20.563  |
| 6.66 | 6.3      | 29.412  | 22.7       | 20.475  |

71

72 Table S8 – P14 site depth profile from 2016 campaign.

| pH   | ODO mg/L | Temp °C | Cond µS/cm | Depth m |
|------|----------|---------|------------|---------|
| 6.59 | 7.19     | 29.67   | 23.1       | 1.374   |
| 6.57 | 7.2      | 29.666  | 23         | 2.37    |
| 6.54 | 7.22     | 29.664  | 23         | 2.877   |
| 6.51 | 7.22     | 29.664  | 23         | 4.137   |
| 6.52 | 7.22     | 29.666  | 23         | 4.648   |
| 6.54 | 7.23     | 29.66   | 22.9       | 5.757   |
| 6.63 | 7.23     | 29.664  | 22.9       | 6.036   |
| 6.64 | 7.22     | 29.665  | 22.9       | 7.077   |
| 6.63 | 7.24     | 29.659  | 22.9       | 7.436   |
| 6.59 | 7.24     | 29.662  | 22.9       | 7.655   |

73

74 Table S9 – P19 site depth profile from 2016 campaign.

| pH   | ODO mg/L | Temp °C | Cond µS/cm | Depth m |
|------|----------|---------|------------|---------|
| 6.63 | 6.78     | 29.647  | 19         | 0.128   |
| 6.56 | 6.47     | 29.665  | 26.3       | 0.286   |
| 6.57 | 6.42     | 29.685  | 26.4       | 0.456   |
| 6.59 | 6.46     | 29.676  | 26.3       | 0.525   |
| 6.59 | 6.1      | 29.657  | 26.5       | 0.579   |
| 6.6  | 6.74     | 29.71   | 26.2       | 0.658   |
| 6.65 | 6.87     | 29.724  | 25.7       | 0.776   |
| 6.68 | 6.34     | 29.712  | 26.2       | 0.926   |
| 6.63 | 5.74     | 29.716  | 27         | 1.076   |
| 6.57 | 5.31     | 29.681  | 27.4       | 1.235   |
| 6.55 | 5.19     | 29.627  | 27.5       | 1.447   |
| 6.54 | 5.02     | 29.625  | 27.6       | 1.722   |
| 6.53 | 4.94     | 29.644  | 27.7       | 2.024   |
| 6.53 | 4.9      | 29.63   | 27.7       | 2.37    |
| 6.55 | 4.84     | 29.608  | 27.7       | 2.721   |
| 6.56 | 4.93     | 29.592  | 27.6       | 3.096   |
| 6.55 | 4.79     | 29.591  | 27.7       | 4.253   |
| 6.52 | 4.13     | 29.601  | 28.1       | 4.597   |
| 6.5  | 3.8      | 29.524  | 28.5       | 4.82    |
| 6.5  | 4.68     | 29.572  | 28         | 5.157   |
| 6.52 | 4.5      | 29.566  | 27.9       | 5.641   |
| 6.51 | 3.74     | 29.509  | 28.3       | 6.091   |
| 6.48 | 3.64     | 29.481  | 28.6       | 6.569   |
| 6.48 | 3.45     | 29.476  | 28.7       | 7.002   |
| 6.49 | 3.91     | 29.515  | 28.3       | 8.164   |
| 6.47 | 3.61     | 29.482  | 28.6       | 8.637   |

75

76 Table S10 – P21 site depth profile from 2016 campaign.

| pH   | ODO mg/L | Temp °C | Cond µS/cm | Depth m |
|------|----------|---------|------------|---------|
| 6.88 | 8.01     | 29.843  | 24.6       | 0.578   |
| 6.87 | 8        | 29.843  | 24.6       | 0.776   |
| 6.86 | 8        | 29.844  | 24.6       | 1.014   |
| 6.87 | 8        | 29.844  | 24.6       | 1.271   |
| 6.89 | 8        | 29.844  | 24.6       | 1.546   |
| 6.92 | 8        | 29.844  | 24.6       | 1.784   |
| 6.9  | 8        | 29.844  | 24.6       | 2.014   |
| 6.9  | 8        | 29.844  | 24.6       | 2.281   |
| 6.91 | 8        | 29.844  | 24.6       | 2.587   |
| 6.94 | 7.99     | 29.843  | 24.6       | 2.903   |
| 6.94 | 7.99     | 29.844  | 24.6       | 3.125   |
| 6.93 | 7.99     | 29.845  | 24.6       | 3.312   |

|      |      |        |      |       |
|------|------|--------|------|-------|
| 6.92 | 7.99 | 29.845 | 24.6 | 3.483 |
| 6.92 | 7.99 | 29.846 | 24.6 | 3.734 |
| 6.92 | 7.98 | 29.846 | 24.6 | 4.033 |
| 6.91 | 7.99 | 29.845 | 24.6 | 4.269 |
| 6.9  | 7.99 | 29.844 | 24.6 | 4.381 |
| 6.91 | 7.98 | 29.845 | 24.6 | 5.535 |
| 6.93 | 7.98 | 29.846 | 24.6 | 5.868 |
| 6.93 | 7.97 | 29.847 | 24.6 | 7.08  |
| 6.96 | 7.97 | 29.848 | 24.6 | 7.244 |
| 6.95 | 7.96 | 29.848 | 24.6 | 8.487 |
| 6.92 | 7.96 | 29.847 | 24.6 | 8.363 |
| 6.9  | 7.96 | 29.847 | 24.6 | 8.267 |

77

78 Table S11 – P4 site depth profile from 2017 campaign.

| pH   | ODO mg/L | Temp °C | Cond µS/cm | Depth m |
|------|----------|---------|------------|---------|
| 7.22 | 7.15     | 29.552  | 33.6       | 0.313   |
| 7.21 | 7.15     | 29.553  | 33.5       | 0.422   |
| 7.21 | 7.14     | 29.553  | 33.5       | 0.528   |
| 7.2  | 7.14     | 29.553  | 33.5       | 0.622   |
| 7.19 | 7.14     | 29.553  | 33.5       | 0.724   |
| 7.19 | 7.13     | 29.553  | 33.5       | 0.83    |
| 7.18 | 7.13     | 29.552  | 33.5       | 0.944   |
| 7.18 | 7.13     | 29.552  | 33.5       | 1.118   |
| 7.18 | 7.13     | 29.552  | 33.5       | 1.275   |
| 7.17 | 7.13     | 29.553  | 33.5       | 1.42    |
| 7.17 | 7.13     | 29.552  | 33.5       | 1.573   |
| 7.16 | 7.12     | 29.552  | 33.4       | 1.721   |
| 7.16 | 7.12     | 29.552  | 33.4       | 1.868   |
| 7.15 | 7.12     | 29.553  | 33.5       | 2.017   |
| 7.15 | 7.12     | 29.553  | 33.5       | 2.15    |
| 7.15 | 7.12     | 29.552  | 33.5       | 2.284   |
| 7.14 | 7.12     | 29.552  | 33.4       | 2.402   |
| 7.14 | 7.12     | 29.552  | 33.4       | 2.483   |
| 7.13 | 7.12     | 29.552  | 33.4       | 2.505   |
| 7.13 | 7.12     | 29.552  | 33.4       | 2.53    |
| 7.12 | 7.12     | 29.552  | 33.4       | 2.557   |
| 7.12 | 7.12     | 29.552  | 33.4       | 2.602   |
| 7.12 | 7.12     | 29.552  | 33.4       | 2.668   |
| 7.12 | 7.11     | 29.552  | 33.5       | 2.728   |
| 7.11 | 7.11     | 29.552  | 33.5       | 2.813   |
| 7.11 | 7.11     | 29.552  | 33.4       | 2.922   |
| 7.11 | 7.11     | 29.552  | 33.4       | 3.06    |



|      |      |        |      |       |
|------|------|--------|------|-------|
| 7.11 | 7.11 | 29.552 | 33.4 | 3.204 |
| 7.11 | 7.11 | 29.552 | 33.4 | 3.318 |
| 7.11 | 7.11 | 29.552 | 33.4 | 3.406 |
| 7.1  | 7.11 | 29.552 | 33.4 | 3.503 |
| 7.1  | 7.11 | 29.552 | 33.4 | 3.624 |
| 7.1  | 7.11 | 29.552 | 33.4 | 3.768 |
| 7.09 | 7.11 | 29.552 | 33.4 | 3.922 |
| 7.09 | 7.1  | 29.553 | 33.4 | 4.054 |
| 7.09 | 7.1  | 29.553 | 33.4 | 4.185 |
| 7.09 | 7.1  | 29.553 | 33.4 | 4.347 |
| 7.09 | 7.1  | 29.553 | 33.4 | 4.5   |
| 7.09 | 7.1  | 29.553 | 33.4 | 4.628 |
| 7.09 | 7.1  | 29.553 | 33.4 | 4.719 |
| 7.09 | 7.1  | 29.553 | 33.4 | 4.807 |
| 7.08 | 7.1  | 29.552 | 33.4 | 4.908 |
| 7.08 | 7.1  | 29.552 | 33.4 | 5.027 |
| 7.07 | 7.1  | 29.553 | 33.4 | 5.148 |
| 7.05 | 7.1  | 29.553 | 33.4 | 5.259 |
| 7.04 | 7.1  | 29.553 | 33.4 | 5.369 |
| 7.02 | 7.1  | 29.553 | 33.4 | 5.501 |
| 7.01 | 7.09 | 29.553 | 33.4 | 5.666 |
| 6.99 | 7.09 | 29.553 | 33.4 | 5.828 |
| 6.98 | 7.09 | 29.553 | 33.4 | 5.987 |
| 6.96 | 7.09 | 29.553 | 33.4 | 6.132 |
| 6.93 | 7.09 | 29.553 | 33.4 | 6.274 |
| 6.91 | 7.09 | 29.553 | 33.4 | 6.414 |
| 6.88 | 7.09 | 29.553 | 33.4 | 6.563 |
| 6.86 | 7.09 | 29.553 | 33.4 | 6.687 |
| 6.85 | 7.09 | 29.553 | 33.4 | 6.77  |
| 6.84 | 7.09 | 29.553 | 33.4 | 6.874 |
| 6.83 | 7.09 | 29.553 | 33.4 | 6.978 |
| 6.82 | 7.09 | 29.552 | 33.4 | 7.068 |
| 6.81 | 7.08 | 29.552 | 33.3 | 7.162 |
| 6.69 | 7.08 | 29.552 | 33.3 | 7.291 |

79

80 Table S13 – P5 site depth profile from 2017 campaign.

| pH   | ODO mg/L | Temp °C | Cond µS/cm | Depth m |
|------|----------|---------|------------|---------|
| 7.27 | 7.29     | 29.934  | 32.2       | 0.157   |
| 7.27 | 7.28     | 29.932  | 32.2       | 0.246   |
| 7.26 | 7.28     | 29.932  | 32.2       | 0.357   |
| 7.25 | 7.28     | 29.932  | 32.2       | 0.464   |
| 7.24 | 7.28     | 29.93   | 32.2       | 0.553   |

|      |      |        |      |       |
|------|------|--------|------|-------|
| 7.23 | 7.28 | 29.93  | 32.3 | 0.642 |
| 7.22 | 7.28 | 29.93  | 32.3 | 0.726 |
| 7.21 | 7.28 | 29.927 | 32.3 | 0.8   |
| 7.2  | 7.28 | 29.924 | 32.3 | 0.88  |
| 7.2  | 7.28 | 29.923 | 32.3 | 0.962 |
| 7.2  | 7.28 | 29.923 | 32.3 | 1.031 |
| 7.19 | 7.28 | 29.924 | 32.4 | 1.115 |
| 7.19 | 7.28 | 29.925 | 32.4 | 1.206 |
| 7.19 | 7.28 | 29.924 | 32.5 | 1.299 |
| 7.19 | 7.28 | 29.924 | 32.5 | 1.404 |
| 7.19 | 7.27 | 29.925 | 32.5 | 1.519 |
| 7.19 | 7.27 | 29.926 | 32.6 | 1.635 |
| 7.19 | 7.27 | 29.928 | 32.6 | 1.751 |
| 7.19 | 7.27 | 29.928 | 32.7 | 1.882 |
| 7.19 | 7.27 | 29.929 | 32.7 | 2.011 |
| 7.18 | 7.27 | 29.929 | 32.7 | 2.141 |
| 7.18 | 7.27 | 29.928 | 32.8 | 2.283 |
| 7.18 | 7.27 | 29.926 | 32.8 | 2.429 |
| 7.18 | 7.27 | 29.925 | 32.9 | 2.586 |
| 7.18 | 7.27 | 29.925 | 33   | 2.745 |
| 7.18 | 7.27 | 29.924 | 33   | 2.904 |
| 7.18 | 7.26 | 29.922 | 33.1 | 3.053 |
| 7.18 | 7.26 | 29.92  | 33.1 | 3.196 |
| 7.18 | 7.26 | 29.919 | 33.1 | 3.33  |
| 7.18 | 7.26 | 29.918 | 33.1 | 3.452 |
| 7.18 | 7.26 | 29.917 | 33.2 | 3.559 |
| 7.18 | 7.26 | 29.916 | 33.2 | 3.661 |
| 7.18 | 7.26 | 29.915 | 33.2 | 3.766 |
| 7.18 | 7.26 | 29.914 | 33.3 | 3.876 |
| 7.18 | 7.26 | 29.912 | 33.3 | 3.988 |
| 7.18 | 7.25 | 29.912 | 33.3 | 4.107 |
| 7.17 | 7.25 | 29.911 | 33.3 | 4.233 |
| 7.17 | 7.25 | 29.911 | 33.3 | 4.361 |
| 7.17 | 7.25 | 29.911 | 33.4 | 4.482 |
| 7.16 | 7.25 | 29.911 | 33.4 | 4.603 |
| 7.16 | 7.25 | 29.911 | 33.4 | 4.714 |
| 7.16 | 7.25 | 29.912 | 33.4 | 4.829 |
| 7.16 | 7.25 | 29.912 | 33.4 | 4.941 |
| 7.15 | 7.25 | 29.912 | 33.4 | 5.061 |
| 7.14 | 7.24 | 29.912 | 33.4 | 5.184 |
| 7.14 | 7.24 | 29.912 | 33.4 | 5.316 |
| 7.14 | 7.24 | 29.911 | 33.5 | 5.442 |
| 7.14 | 7.24 | 29.911 | 33.5 | 5.557 |
| 7.14 | 7.24 | 29.911 | 33.5 | 5.66  |
| 7.14 | 7.24 | 29.911 | 33.5 | 5.761 |

|      |      |        |      |       |
|------|------|--------|------|-------|
| 7.14 | 7.24 | 29.911 | 33.5 | 5.836 |
| 7.14 | 7.24 | 29.91  | 33.5 | 5.879 |
| 7.14 | 7.24 | 29.909 | 33.5 | 5.918 |
| 7.14 | 7.24 | 29.909 | 33.5 | 5.966 |
| 7.14 | 7.24 | 29.909 | 33.5 | 6.043 |
| 7.14 | 7.23 | 29.909 | 33.5 | 6.128 |
| 7.13 | 7.23 | 29.909 | 33.5 | 6.226 |
| 7.13 | 7.23 | 29.909 | 33.6 | 6.346 |
| 7.12 | 7.23 | 29.909 | 33.6 | 7.481 |
| 7.11 | 7.23 | 29.909 | 33.6 | 7.514 |
| 7.1  | 7.23 | 29.909 | 33.6 | 7.556 |
| 7.09 | 7.23 | 29.908 | 33.6 | 7.558 |
| 7.09 | 7.23 | 29.908 | 33.6 | 7.585 |
| 7.09 | 7.23 | 29.908 | 33.6 | 7.656 |
| 7.08 | 7.22 | 29.908 | 33.6 | 7.731 |
| 7.08 | 7.22 | 29.908 | 33.6 | 7.809 |
| 7.07 | 7.22 | 29.908 | 33.6 | 7.9   |
| 7.07 | 7.22 | 29.909 | 33.6 | 7.998 |

81

82 Table S14 – P6 site depth profile from 2017 campaign.

| pH   | ODO mg/L | Temp °C | Cond µS/cm | Depth m |
|------|----------|---------|------------|---------|
| 6.93 | 7.32     | 30.83   | 33.8       | 0.264   |
| 6.94 | 7.32     | 30.811  | 33.7       | 0.316   |
| 6.94 | 7.31     | 30.764  | 33.7       | 0.388   |
| 6.93 | 7.23     | 30.686  | 33.7       | 0.476   |
| 6.91 | 7.14     | 30.578  | 33.7       | 0.541   |
| 6.88 | 7.07     | 30.505  | 33.7       | 0.576   |
| 6.85 | 7.01     | 30.421  | 33.7       | 0.609   |
| 6.67 | 6.6      | 30.323  | 33.7       | 0.661   |
| 6.63 | 6.42     | 30.21   | 33.8       | 0.728   |
| 6.6  | 6.29     | 30.104  | 33.9       | 0.797   |
| 6.58 | 5.97     | 30.052  | 34         | 0.835   |
| 6.57 | 5.94     | 30.022  | 34.1       | 0.874   |
| 6.56 | 5.91     | 30.011  | 34.1       | 0.915   |
| 6.55 | 5.86     | 30.007  | 34.2       | 0.957   |
| 6.53 | 5.53     | 29.972  | 34.2       | 1.021   |
| 6.38 | 5.25     | 29.9    | 34.4       | 1.075   |
| 6.33 | 4.53     | 29.805  | 34.6       | 1.148   |
| 6.32 | 4.35     | 29.748  | 34.8       | 1.223   |
| 6.32 | 4.26     | 29.714  | 34.9       | 1.291   |
| 6.32 | 4.16     | 29.683  | 35         | 1.383   |
| 6.33 | 4.43     | 29.634  | 34.8       | 1.485   |

|      |      |        |      |       |
|------|------|--------|------|-------|
| 6.35 | 4.6  | 29.583 | 34.7 | 1.578 |
| 6.37 | 4.71 | 29.556 | 34.6 | 1.639 |
| 6.4  | 4.81 | 29.547 | 34.6 | 1.689 |
| 6.43 | 4.95 | 29.483 | 34.3 | 1.761 |
| 6.44 | 5.02 | 29.389 | 34.1 | 1.855 |
| 6.44 | 4.74 | 29.275 | 34.1 | 1.938 |
| 6.43 | 4.56 | 29.209 | 34.3 | 2.007 |
| 6.42 | 4.46 | 29.165 | 34.4 | 2.084 |
| 6.4  | 4.13 | 29.141 | 34.5 | 2.163 |
| 6.39 | 3.92 | 29.107 | 34.6 | 2.264 |
| 6.37 | 3.78 | 29.073 | 34.8 | 2.363 |
| 6.35 | 3.71 | 29.035 | 34.9 | 2.42  |
| 6.33 | 3.59 | 29.023 | 35   | 2.477 |
| 6.32 | 3.5  | 29.012 | 35.1 | 2.537 |
| 6.31 | 3.4  | 29     | 35.2 | 2.591 |
| 6.3  | 2.96 | 28.98  | 35.2 | 2.675 |
| 6.29 | 2.92 | 28.96  | 35.3 | 2.757 |
| 6.28 | 2.9  | 28.954 | 35.4 | 2.808 |
| 6.27 | 2.86 | 28.944 | 35.4 | 2.855 |
| 6.27 | 2.82 | 28.938 | 35.5 | 2.903 |
| 6.27 | 2.78 | 28.933 | 35.6 | 2.965 |
| 6.26 | 2.72 | 28.929 | 35.6 | 3.05  |
| 6.26 | 2.65 | 28.924 | 35.6 | 3.105 |
| 6.26 | 2.59 | 28.92  | 35.6 | 3.153 |
| 6.25 | 2.5  | 28.91  | 35.7 | 3.21  |
| 6.24 | 2.41 | 28.909 | 35.7 | 3.227 |
| 6.24 | 2.4  | 28.915 | 35.7 | 3.248 |
| 6.24 | 2.46 | 28.919 | 35.6 | 3.266 |

83

84 Table S15 – P7 site depth profile from 2017 campaign.

| pH   | ODO mg/L | Temp °C | Cond µS/cm | Depth m |
|------|----------|---------|------------|---------|
| 6.91 | 6.95     | 29.479  | 32.6       | 0.316   |
| 6.91 | 6.94     | 29.479  | 32.6       | 0.456   |
| 6.91 | 6.94     | 29.487  | 32.6       | 0.598   |
| 6.91 | 6.95     | 29.522  | 32.5       | 0.735   |
| 6.92 | 6.96     | 29.525  | 32.5       | 0.871   |
| 6.92 | 6.95     | 29.499  | 32.5       | 1.004   |
| 6.92 | 6.94     | 29.478  | 32.5       | 1.132   |
| 6.92 | 6.95     | 29.541  | 32.5       | 1.246   |
| 6.93 | 7        | 29.666  | 32.4       | 1.346   |
| 6.95 | 7.07     | 29.749  | 32.3       | 1.454   |
| 6.98 | 7.12     | 29.778  | 32.3       | 1.578   |

|      |      |        |      |        |
|------|------|--------|------|--------|
| 7    | 7.13 | 29.742 | 32.4 | 1.723  |
| 7.01 | 7.13 | 29.73  | 32.4 | 1.855  |
| 7.01 | 7.12 | 29.682 | 32.5 | 1.978  |
| 7    | 7.08 | 29.608 | 32.5 | 2.106  |
| 6.98 | 7.03 | 29.538 | 32.6 | 2.245  |
| 6.96 | 6.98 | 29.519 | 32.7 | 3.119  |
| 6.95 | 6.97 | 29.515 | 32.7 | 3.214  |
| 6.94 | 6.96 | 29.513 | 32.7 | 3.308  |
| 6.94 | 6.95 | 29.513 | 32.7 | 3.413  |
| 6.94 | 6.95 | 29.516 | 32.8 | 3.504  |
| 6.94 | 6.95 | 29.514 | 32.8 | 3.588  |
| 6.94 | 6.95 | 29.509 | 32.9 | 3.669  |
| 6.93 | 6.94 | 29.501 | 32.9 | 3.745  |
| 6.93 | 6.94 | 29.494 | 32.9 | 3.819  |
| 6.93 | 6.93 | 29.485 | 33   | 3.962  |
| 6.93 | 6.92 | 29.484 | 33   | 4.109  |
| 6.93 | 6.92 | 29.489 | 33.1 | 4.253  |
| 6.93 | 6.92 | 29.496 | 33.1 | 4.395  |
| 6.93 | 6.93 | 29.504 | 33.1 | 4.533  |
| 6.93 | 6.93 | 29.506 | 33.2 | 4.686  |
| 6.93 | 6.93 | 29.501 | 33.2 | 4.842  |
| 6.92 | 6.93 | 29.503 | 33.2 | 5.791  |
| 6.92 | 6.93 | 29.511 | 33.2 | 5.896  |
| 6.92 | 6.93 | 29.513 | 33.3 | 5.905  |
| 6.92 | 6.93 | 29.509 | 33.3 | 5.923  |
| 6.92 | 6.93 | 29.499 | 33.3 | 5.962  |
| 6.92 | 6.92 | 29.488 | 33.4 | 6.016  |
| 6.91 | 6.91 | 29.479 | 33.4 | 6.102  |
| 6.91 | 6.9  | 29.477 | 33.4 | 7.035  |
| 6.9  | 6.9  | 29.471 | 33.5 | 7.176  |
| 6.9  | 6.89 | 29.463 | 33.5 | 7.263  |
| 6.9  | 6.88 | 29.46  | 33.5 | 7.343  |
| 6.9  | 6.88 | 29.464 | 33.5 | 7.417  |
| 6.9  | 6.89 | 29.474 | 33.5 | 7.492  |
| 6.9  | 6.89 | 29.484 | 33.6 | 7.572  |
| 6.91 | 6.9  | 29.496 | 33.6 | 7.656  |
| 6.91 | 6.91 | 29.517 | 33.6 | 7.766  |
| 6.92 | 6.93 | 29.541 | 33.6 | 8.693  |
| 6.92 | 6.94 | 29.554 | 33.6 | 8.874  |
| 6.93 | 6.94 | 29.553 | 33.6 | 9.041  |
| 6.93 | 6.94 | 29.545 | 33.6 | 9.229  |
| 6.93 | 6.94 | 29.541 | 33.6 | 9.409  |
| 6.93 | 6.93 | 29.538 | 33.7 | 10.304 |
| 6.93 | 6.93 | 29.537 | 33.7 | 10.524 |
| 6.92 | 6.93 | 29.538 | 33.7 | 10.648 |

|      |      |        |      |        |
|------|------|--------|------|--------|
| 6.92 | 6.93 | 29.534 | 33.7 | 10.753 |
| 6.92 | 6.92 | 29.524 | 33.7 | 10.858 |
| 6.91 | 6.91 | 29.513 | 33.7 | 10.971 |
| 6.91 | 6.9  | 29.499 | 33.7 | 11.079 |
| 6.9  | 6.89 | 29.482 | 33.8 | 11.899 |
| 6.89 | 6.87 | 29.471 | 33.8 | 12.004 |
| 6.89 | 6.86 | 29.458 | 33.8 | 12.133 |
| 6.88 | 6.85 | 29.455 | 33.8 | 12.223 |
| 6.88 | 6.85 | 29.462 | 33.8 | 12.324 |
| 6.88 | 6.86 | 29.47  | 33.8 | 12.403 |
| 6.88 | 6.86 | 29.474 | 33.8 | 12.483 |
| 6.88 | 6.86 | 29.477 | 33.8 | 12.566 |
| 6.88 | 6.86 | 29.483 | 33.8 | 12.654 |
| 6.88 | 6.87 | 29.493 | 33.8 | 12.81  |
| 6.88 | 6.87 | 29.504 | 33.8 | 12.963 |
| 6.88 | 6.88 | 29.51  | 33.8 | 13.114 |
| 6.88 | 6.88 | 29.511 | 33.8 | 14.017 |
| 6.89 | 6.88 | 29.514 | 33.8 | 14.163 |
| 6.89 | 6.88 | 29.519 | 33.8 | 14.229 |
| 6.89 | 6.89 | 29.519 | 33.8 | 14.346 |
| 6.89 | 6.88 | 29.513 | 33.8 | 14.502 |
| 6.89 | 6.88 | 29.504 | 33.8 | 15.504 |
| 6.88 | 6.87 | 29.492 | 33.9 | 15.612 |
| 6.88 | 6.86 | 29.484 | 33.9 | 15.668 |
| 6.87 | 6.85 | 29.481 | 33.9 | 15.74  |
| 6.87 | 6.85 | 29.486 | 33.9 | 15.821 |
| 6.87 | 6.85 | 29.483 | 33.9 | 15.908 |
| 6.86 | 6.85 | 29.476 | 33.9 | 16.01  |
| 6.86 | 6.84 | 29.474 | 33.9 | 16.103 |
| 6.85 | 6.84 | 29.477 | 33.9 | 16.965 |
| 6.85 | 6.84 | 29.475 | 33.9 | 17.125 |
| 6.85 | 6.84 | 29.472 | 33.9 | 17.24  |
| 6.84 | 6.84 | 29.473 | 33.9 | 17.346 |
| 6.84 | 6.83 | 29.473 | 33.9 | 17.48  |
| 6.83 | 6.84 | 29.478 | 33.9 | 18.401 |
| 6.83 | 6.84 | 29.486 | 33.9 | 18.702 |
| 6.82 | 6.84 | 29.492 | 33.9 | 18.833 |

85

86 Table S16 – P8 site depth profile from 2017 campaign.

| pH   | ODO mg/L | Temp °C | Cond µS/cm | Depth m |
|------|----------|---------|------------|---------|
| 6.92 | 7.4      | 30.755  | 34.6       | 0.137   |
| 6.91 | 7.35     | 30.679  | 34.5       | 0.244   |

|      |      |        |      |       |
|------|------|--------|------|-------|
| 6.9  | 7.31 | 30.598 | 34.4 | 0.358 |
| 6.89 | 7.28 | 30.551 | 34.3 | 0.464 |
| 6.88 | 7.26 | 30.54  | 34.2 | 0.569 |
| 6.88 | 7.25 | 30.538 | 34.1 | 0.649 |
| 6.88 | 7.24 | 30.536 | 34   | 0.71  |
| 6.88 | 7.23 | 30.532 | 33.9 | 0.757 |
| 6.88 | 7.23 | 30.53  | 33.8 | 0.778 |
| 6.88 | 7.23 | 30.532 | 33.7 | 0.766 |
| 6.88 | 7.22 | 30.534 | 33.7 | 0.738 |
| 6.88 | 7.23 | 30.535 | 33.6 | 0.708 |

87

88 Table S17 – P9 site depth profile from 2017 campaign.

| pH   | ODO mg/L | Temp °C | Cond $\mu$ S/cm | Depth m |
|------|----------|---------|-----------------|---------|
| 6.74 | 0.46     | 29.982  | 36.4            | 0.114   |
| 6.72 | 0.45     | 29.871  | 36.1            | 0.154   |
| 6.7  | 0.45     | 29.801  | 36              | 0.185   |
| 6.69 | 0.45     | 29.783  | 35.9            | 0.188   |
| 6.68 | 0.45     | 29.829  | 35.8            | 0.183   |
| 6.68 | 0.44     | 29.923  | 35.8            | 0.178   |
| 6.69 | 0.44     | 30.029  | 35.7            | 0.197   |
| 6.69 | 0.43     | 30.046  | 35.6            | 0.226   |
| 6.69 | 0.43     | 29.971  | 35.5            | 0.266   |
| 6.69 | 0.43     | 29.883  | 35.5            | 0.315   |
| 6.69 | 0.43     | 29.858  | 35.4            | 0.37    |
| 6.68 | 0.43     | 29.882  | 35.4            | 0.436   |
| 6.68 | 0.43     | 29.909  | 35.3            | 0.514   |
| 6.68 | 0.43     | 29.928  | 35.3            | 0.587   |
| 6.68 | 0.42     | 29.909  | 35.2            | 0.653   |
| 6.67 | 0.42     | 29.813  | 35.1            | 0.723   |
| 6.67 | 0.42     | 29.684  | 35              | 0.794   |
| 6.66 | 0.42     | 29.579  | 34.9            | 0.864   |
| 6.65 | 0.43     | 29.513  | 34.8            | 0.938   |
| 6.64 | 0.43     | 29.477  | 34.8            | 1.004   |
| 6.64 | 0.42     | 29.462  | 34.7            | 1.067   |
| 6.64 | 0.42     | 29.463  | 34.7            | 1.124   |
| 6.63 | 0.42     | 29.465  | 34.6            | 1.163   |
| 6.63 | 0.42     | 29.468  | 34.6            | 1.186   |
| 6.62 | 0.42     | 29.469  | 34.5            | 1.205   |
| 6.62 | 0.42     | 29.468  | 34.5            | 1.227   |
| 6.62 | 0.42     | 29.463  | 34.5            | 1.246   |
| 6.62 | 0.42     | 29.455  | 34.5            | 1.262   |
| 6.62 | 0.41     | 29.449  | 34.4            | 1.272   |

|      |      |        |      |       |
|------|------|--------|------|-------|
| 6.63 | 0.41 | 29.448 | 34.4 | 1.285 |
| 6.63 | 0.41 | 29.449 | 34.4 | 1.313 |
| 6.63 | 0.41 | 29.448 | 34.4 | 1.348 |
| 6.63 | 0.41 | 29.447 | 34.4 | 1.372 |
| 6.63 | 0.41 | 29.447 | 34.3 | 1.396 |
| 6.62 | 0.41 | 29.446 | 34.3 | 1.423 |
| 6.62 | 0.41 | 29.443 | 34.3 | 1.453 |
| 6.62 | 0.41 | 29.442 | 34.3 | 1.49  |
| 6.62 | 0.4  | 29.445 | 34.3 | 1.532 |
| 6.62 | 0.4  | 29.445 | 34.3 | 1.58  |
| 6.62 | 0.4  | 29.439 | 34.3 | 1.641 |
| 6.62 | 0.4  | 29.43  | 34.3 | 1.708 |
| 6.62 | 0.4  | 29.422 | 34.3 | 1.777 |
| 6.62 | 0.4  | 29.415 | 34.3 | 1.858 |
| 6.62 | 0.4  | 29.41  | 34.2 | 1.938 |
| 6.62 | 0.4  | 29.404 | 34.2 | 2.025 |
| 6.61 | 0.4  | 29.395 | 34.2 | 2.116 |
| 6.61 | 0.4  | 29.389 | 34.2 | 2.209 |
| 6.61 | 0.4  | 29.388 | 34.2 | 2.302 |
| 6.61 | 0.4  | 29.386 | 34.2 | 2.398 |
| 6.61 | 0.4  | 29.384 | 34.2 | 2.494 |
| 6.61 | 0.4  | 29.379 | 34.2 | 2.594 |
| 6.61 | 0.4  | 29.376 | 34.2 | 2.69  |
| 6.61 | 0.4  | 29.371 | 34.2 | 2.79  |
| 6.6  | 0.4  | 29.365 | 34.2 | 2.899 |
| 6.6  | 0.4  | 29.364 | 34.2 | 3.008 |
| 6.6  | 0.41 | 29.365 | 34.2 | 3.126 |
| 6.6  | 0.41 | 29.367 | 34.2 | 3.239 |
| 6.6  | 0.41 | 29.368 | 34.1 | 3.354 |
| 6.6  | 0.41 | 29.368 | 34.1 | 3.472 |
| 6.6  | 0.41 | 29.368 | 34.1 | 3.588 |
| 6.6  | 0.41 | 29.369 | 34.1 | 3.698 |
| 6.6  | 0.41 | 29.369 | 34.1 | 3.797 |
| 6.6  | 0.41 | 29.368 | 34.1 | 3.887 |
| 6.6  | 0.41 | 29.368 | 34.1 | 3.979 |
| 6.6  | 0.41 | 29.367 | 34.1 | 4.082 |
| 6.6  | 0.41 | 29.366 | 34.1 | 4.183 |
| 6.6  | 0.41 | 29.365 | 34.1 | 4.286 |
| 6.6  | 0.41 | 29.364 | 34.1 | 4.393 |
| 6.59 | 0.41 | 29.363 | 34.1 | 4.51  |
| 6.59 | 0.41 | 29.362 | 34.1 | 4.62  |
| 6.59 | 0.41 | 29.362 | 34.2 | 4.731 |
| 6.59 | 0.41 | 29.361 | 34.2 | 4.827 |
| 6.59 | 0.41 | 29.36  | 34.2 | 4.906 |
| 6.59 | 0.41 | 29.36  | 34.2 | 4.973 |



|      |      |        |      |       |
|------|------|--------|------|-------|
| 6.59 | 0.41 | 29.359 | 34.2 | 5.026 |
| 6.59 | 0.41 | 29.357 | 34.2 | 5.056 |
| 6.59 | 0.41 | 29.357 | 34.2 | 5.076 |
| 6.59 | 0.41 | 29.356 | 34.2 | 5.096 |
| 6.59 | 0.41 | 29.356 | 34.2 | 5.12  |
| 6.59 | 0.4  | 29.355 | 34.2 | 5.161 |
| 6.59 | 0.41 | 29.347 | 34.2 | 5.258 |
| 6.58 | 0.41 | 29.339 | 34.2 | 5.366 |
| 6.58 | 0.41 | 29.333 | 34.2 | 5.49  |
| 6.57 | 0.41 | 29.331 | 34.2 | 5.625 |
| 6.57 | 0.41 | 29.329 | 34.2 | 5.774 |
| 6.57 | 0.41 | 29.329 | 34.2 | 5.923 |

89

90 Table S18 – P10 site depth profile from 2017 campaign.

| pH   | ODO mg/L | Temp °C | Cond µS/cm | Depth m |
|------|----------|---------|------------|---------|
| 6.74 | 6.68     | 30.726  | 36.9       | 0.164   |
| 6.74 | 6.69     | 30.717  | 36.9       | 0.245   |
| 6.74 | 6.7      | 30.699  | 36.8       | 0.34    |
| 6.74 | 6.71     | 30.672  | 36.8       | 0.422   |
| 6.75 | 6.72     | 30.653  | 36.8       | 0.497   |
| 6.76 | 6.73     | 30.631  | 36.8       | 0.577   |
| 6.76 | 6.74     | 30.606  | 36.9       | 0.667   |
| 6.77 | 6.75     | 30.591  | 36.9       | 0.761   |
| 6.78 | 6.76     | 30.568  | 36.8       | 0.853   |
| 6.79 | 6.77     | 30.541  | 36.8       | 0.942   |
| 6.8  | 6.78     | 30.507  | 36.8       | 1.029   |
| 6.8  | 6.79     | 30.474  | 36.7       | 1.107   |
| 6.81 | 6.78     | 30.441  | 36.6       | 1.19    |
| 6.8  | 6.73     | 30.408  | 36.6       | 1.281   |
| 6.79 | 6.29     | 30.348  | 36.7       | 1.374   |
| 6.78 | 6.1      | 30.256  | 36.8       | 1.471   |
| 6.66 | 5.69     | 30.148  | 36.7       | 1.565   |
| 6.6  | 5.6      | 30.066  | 36.6       | 1.663   |
| 6.58 | 5.54     | 30.014  | 36.6       | 1.76    |
| 6.57 | 5.45     | 30      | 36.5       | 1.858   |
| 6.56 | 5.38     | 29.988  | 36.5       | 1.959   |
| 6.56 | 5.32     | 29.976  | 36.5       | 2.059   |
| 6.55 | 5.29     | 29.968  | 36.5       | 2.159   |
| 6.54 | 5.27     | 29.963  | 36.5       | 2.256   |
| 6.54 | 5.26     | 29.957  | 36.4       | 2.352   |
| 6.53 | 5.25     | 29.952  | 36.4       | 2.451   |
| 6.53 | 5.24     | 29.945  | 36.4       | 2.548   |

|      |      |        |      |       |
|------|------|--------|------|-------|
| 6.53 | 5.23 | 29.936 | 36.4 | 2.647 |
| 6.52 | 5.18 | 29.921 | 36.4 | 2.757 |
| 6.51 | 5.11 | 29.905 | 36.4 | 2.872 |
| 6.5  | 5.05 | 29.893 | 36.4 | 3.006 |
| 6.48 | 5    | 29.886 | 36.5 | 3.146 |
| 6.47 | 4.94 | 29.879 | 36.5 | 3.289 |
| 6.47 | 4.86 | 29.873 | 36.5 | 3.417 |
| 6.46 | 4.79 | 29.871 | 36.6 | 3.528 |
| 6.45 | 4.74 | 29.871 | 36.6 | 3.621 |
| 6.44 | 4.71 | 29.871 | 36.6 | 3.69  |
| 6.44 | 4.68 | 29.87  | 36.6 | 3.736 |
| 6.44 | 4.66 | 29.866 | 36.6 | 3.758 |
| 6.43 | 4.64 | 29.863 | 36.7 | 3.765 |
| 6.43 | 4.62 | 29.863 | 36.7 | 3.775 |
| 6.43 | 4.58 | 29.862 | 36.7 | 3.778 |
| 6.42 | 4.55 | 29.859 | 36.7 | 3.793 |
| 6.41 | 4.51 | 29.853 | 36.8 | 3.818 |
| 6.41 | 4.45 | 29.844 | 36.8 | 3.861 |
| 6.39 | 4.07 | 29.829 | 37   | 3.924 |
| 6.26 | 3.82 | 29.802 | 37.3 | 4.831 |

91

92 Table S19 – P11 site depth profile from 2017 campaign.

| pH   | ODO mg/L | Temp °C | Cond µS/cm | Depth m |
|------|----------|---------|------------|---------|
| 6.79 | 6.81     | 29.955  | 32.7       | 1.063   |
| 6.8  | 6.77     | 29.945  | 32.7       | 1.248   |
| 6.81 | 6.76     | 29.945  | 32.8       | 1.334   |
| 6.83 | 6.75     | 29.947  | 32.9       | 1.462   |
| 6.84 | 6.75     | 29.944  | 33         | 1.592   |
| 6.85 | 6.74     | 29.938  | 33.1       | 1.699   |
| 6.86 | 6.74     | 29.939  | 33.1       | 1.787   |
| 6.88 | 6.74     | 29.945  | 33.2       | 1.862   |
| 6.88 | 6.74     | 29.949  | 33.2       | 2.718   |
| 6.89 | 6.74     | 29.95   | 33.3       | 2.816   |
| 6.89 | 6.74     | 29.949  | 33.3       | 2.865   |
| 6.9  | 6.73     | 29.95   | 33.4       | 2.933   |
| 6.9  | 6.73     | 29.95   | 33.4       | 3.019   |
| 6.9  | 6.74     | 29.952  | 33.5       | 3.096   |
| 6.9  | 6.74     | 29.955  | 33.5       | 3.178   |
| 6.91 | 6.73     | 29.957  | 33.5       | 3.256   |
| 6.91 | 6.73     | 29.955  | 33.6       | 4.092   |
| 6.91 | 6.73     | 29.955  | 33.6       | 4.161   |
| 6.91 | 6.73     | 29.95   | 33.6       | 4.252   |

|      |      |        |      |        |
|------|------|--------|------|--------|
| 6.91 | 6.73 | 29.942 | 33.6 | 4.341  |
| 6.91 | 6.72 | 29.934 | 33.6 | 4.423  |
| 6.91 | 6.72 | 29.935 | 33.7 | 4.508  |
| 6.91 | 6.72 | 29.938 | 33.7 | 4.592  |
| 6.92 | 6.72 | 29.939 | 33.7 | 5.364  |
| 6.92 | 6.72 | 29.936 | 33.7 | 5.467  |
| 6.92 | 6.72 | 29.932 | 33.7 | 5.517  |
| 6.92 | 6.72 | 29.932 | 33.8 | 5.578  |
| 6.92 | 6.72 | 29.934 | 33.8 | 5.669  |
| 6.91 | 6.73 | 29.936 | 33.8 | 5.769  |
| 6.91 | 6.73 | 29.935 | 33.8 | 5.861  |
| 6.91 | 6.73 | 29.934 | 33.8 | 5.939  |
| 6.91 | 6.73 | 29.931 | 33.8 | 6.011  |
| 6.92 | 6.73 | 29.929 | 33.8 | 6.169  |
| 6.92 | 6.73 | 29.928 | 33.8 | 6.325  |
| 6.92 | 6.73 | 29.928 | 33.8 | 6.471  |
| 6.92 | 6.73 | 29.928 | 33.8 | 6.587  |
| 6.92 | 6.73 | 29.928 | 33.9 | 6.693  |
| 6.91 | 6.73 | 29.927 | 33.9 | 6.799  |
| 6.91 | 6.73 | 29.929 | 33.8 | 6.92   |
| 6.92 | 6.73 | 29.93  | 33.9 | 7.041  |
| 6.92 | 6.73 | 29.931 | 33.9 | 7.153  |
| 6.92 | 6.74 | 29.932 | 33.9 | 7.267  |
| 6.92 | 6.74 | 29.932 | 33.9 | 7.39   |
| 6.92 | 6.74 | 29.931 | 33.9 | 7.536  |
| 6.91 | 6.74 | 29.93  | 33.9 | 8.263  |
| 6.91 | 6.74 | 29.931 | 33.9 | 8.431  |
| 6.91 | 6.74 | 29.933 | 33.9 | 8.58   |
| 6.91 | 6.74 | 29.934 | 33.9 | 8.697  |
| 6.92 | 6.74 | 29.934 | 33.9 | 8.815  |
| 6.92 | 6.74 | 29.932 | 33.9 | 8.922  |
| 6.92 | 6.74 | 29.929 | 33.9 | 9.034  |
| 6.92 | 6.74 | 29.925 | 33.9 | 9.92   |
| 6.92 | 6.74 | 29.925 | 33.9 | 9.999  |
| 6.92 | 6.74 | 29.925 | 33.9 | 10.004 |
| 6.91 | 6.74 | 29.926 | 33.9 | 9.96   |
| 6.91 | 6.74 | 29.927 | 33.9 | 10.078 |
| 6.91 | 6.74 | 29.927 | 33.9 | 10.918 |
| 6.92 | 6.74 | 29.928 | 33.9 | 11.088 |
| 6.92 | 6.74 | 29.927 | 33.9 | 11.335 |
| 6.92 | 6.74 | 29.926 | 33.8 | 11.414 |
| 6.91 | 6.74 | 29.925 | 33.8 | 11.512 |
| 6.91 | 6.74 | 29.925 | 33.9 | 11.602 |
| 6.91 | 6.74 | 29.925 | 33.9 | 11.709 |
| 6.91 | 6.74 | 29.925 | 33.9 | 12.506 |

|      |      |        |      |        |
|------|------|--------|------|--------|
| 6.91 | 6.73 | 29.926 | 33.8 | 12.738 |
| 6.91 | 6.73 | 29.925 | 33.8 | 12.784 |
| 6.91 | 6.74 | 29.925 | 33.8 | 12.891 |
| 6.91 | 6.74 | 29.924 | 33.8 | 13.004 |
| 6.91 | 6.73 | 29.924 | 33.8 | 13.112 |
| 6.91 | 6.73 | 29.924 | 33.8 | 13.216 |
| 6.91 | 6.73 | 29.925 | 33.8 | 14.001 |
| 6.91 | 6.73 | 29.926 | 33.8 | 14.137 |
| 6.91 | 6.73 | 29.926 | 33.8 | 14.259 |
| 6.91 | 6.73 | 29.926 | 33.8 | 14.39  |
| 6.9  | 6.73 | 29.926 | 33.8 | 14.458 |
| 6.9  | 6.73 | 29.925 | 33.8 | 15.245 |
| 6.89 | 6.73 | 29.924 | 33.8 | 15.463 |
| 6.89 | 6.73 | 29.923 | 33.8 | 15.606 |
| 6.88 | 6.72 | 29.923 | 33.8 | 15.74  |
| 6.87 | 6.72 | 29.923 | 33.8 | 15.932 |
| 6.85 | 6.72 | 29.924 | 33.8 | 16.843 |
| 6.83 | 6.72 | 29.924 | 33.8 | 17.246 |
| 6.73 | 6.72 | 29.924 | 33.8 | 17.329 |
| 6.72 | 6.71 | 29.924 | 33.8 | 17.501 |
| 6.72 | 6.71 | 29.924 | 33.8 | 18.764 |
| 6.71 | 6.71 | 29.924 | 33.8 | 19.109 |
| 6.71 | 6.71 | 29.924 | 33.8 | 19.325 |

93

94 Table S20 – P13 site depth profile from 2017 campaign.

| pH   | ODO mg/L | Temp °C | Cond µS/cm | Depth m |
|------|----------|---------|------------|---------|
| 6.9  | 6.88     | 30.218  | 34.5       | 0.142   |
| 6.91 | 6.88     | 30.22   | 34.5       | 0.202   |
| 6.91 | 6.88     | 30.219  | 34.5       | 0.265   |
| 6.91 | 6.88     | 30.2    | 34.5       | 0.335   |
| 6.91 | 6.86     | 30.165  | 34.4       | 0.404   |
| 6.91 | 6.83     | 30.125  | 34.3       | 0.488   |
| 6.9  | 6.81     | 30.099  | 34.2       | 0.567   |
| 6.89 | 6.79     | 30.084  | 34.1       | 0.629   |
| 6.88 | 6.78     | 30.08   | 34         | 0.695   |
| 6.87 | 6.77     | 30.074  | 33.9       | 0.771   |
| 6.86 | 6.76     | 30.063  | 33.8       | 0.845   |
| 6.86 | 6.75     | 30.044  | 33.7       | 1.737   |
| 6.86 | 6.73     | 30.009  | 33.6       | 1.942   |
| 6.85 | 6.7      | 29.969  | 33.5       | 2.06    |
| 6.85 | 6.66     | 29.937  | 33.4       | 2.173   |
| 6.84 | 6.62     | 29.919  | 33.3       | 2.274   |

|      |      |        |      |       |
|------|------|--------|------|-------|
| 6.84 | 6.59 | 29.91  | 33.3 | 2.35  |
| 6.83 | 6.56 | 29.904 | 33.3 | 2.411 |
| 6.82 | 6.54 | 29.899 | 33.3 | 2.467 |
| 6.82 | 6.53 | 29.891 | 33.2 | 2.527 |
| 6.81 | 6.51 | 29.884 | 33.2 | 2.676 |
| 6.8  | 6.49 | 29.88  | 33.2 | 2.821 |
| 6.8  | 6.48 | 29.878 | 33.2 | 2.959 |
| 6.8  | 6.48 | 29.877 | 33.2 | 3.1   |
| 6.8  | 6.47 | 29.876 | 33.2 | 3.254 |
| 6.8  | 6.46 | 29.876 | 33.2 | 3.419 |
| 6.8  | 6.46 | 29.875 | 33.2 | 3.588 |
| 6.8  | 6.45 | 29.875 | 33.3 | 3.753 |
| 6.8  | 6.45 | 29.874 | 33.3 | 3.913 |
| 6.8  | 6.45 | 29.873 | 33.3 | 4.056 |
| 6.8  | 6.44 | 29.872 | 33.3 | 4.196 |
| 6.8  | 6.44 | 29.872 | 33.3 | 4.343 |
| 6.8  | 6.43 | 29.871 | 33.4 | 5.221 |
| 6.8  | 6.43 | 29.871 | 33.4 | 5.326 |
| 6.79 | 6.42 | 29.87  | 33.5 | 5.479 |
| 6.79 | 6.4  | 29.867 | 33.5 | 5.563 |
| 6.78 | 6.39 | 29.865 | 33.5 | 5.617 |
| 6.78 | 6.39 | 29.864 | 33.6 | 5.679 |
| 6.77 | 6.38 | 29.862 | 33.6 | 5.782 |
| 6.77 | 6.37 | 29.859 | 33.7 | 5.88  |
| 6.77 | 6.36 | 29.857 | 33.7 | 5.967 |
| 6.77 | 6.35 | 29.856 | 33.8 | 6.117 |
| 6.77 | 6.35 | 29.855 | 33.8 | 6.264 |

95

96 Table S21 – P12 site depth profile from 2017 campaign.

| pH   | ODO mg/L | Temp °C | Cond µS/cm | Depth m |
|------|----------|---------|------------|---------|
| 7.02 | 7.03     | 30.424  | 34.5       | 0.317   |
| 7.01 | 7.03     | 30.419  | 34.4       | 0.467   |
| 7    | 7.03     | 30.393  | 34.5       | 0.631   |
| 6.99 | 7.03     | 30.358  | 34.5       | 0.809   |
| 6.98 | 7.02     | 30.335  | 34.4       | 0.953   |
| 6.97 | 7.02     | 30.328  | 34.4       | 1.063   |
| 6.96 | 7.01     | 30.318  | 34.4       | 1.169   |
| 6.96 | 7.01     | 30.291  | 34.4       | 1.257   |
| 6.96 | 7        | 30.251  | 34.5       | 1.341   |
| 6.95 | 6.97     | 30.21   | 34.4       | 1.43    |
| 6.94 | 6.94     | 30.168  | 34.4       | 1.522   |
| 6.93 | 6.9      | 30.123  | 34.5       | 1.613   |

|      |      |        |      |       |
|------|------|--------|------|-------|
| 6.92 | 6.86 | 30.081 | 34.5 | 1.709 |
| 6.9  | 6.82 | 30.051 | 34.5 | 1.807 |
| 6.89 | 6.77 | 30.021 | 34.5 | 1.899 |
| 6.87 | 6.71 | 29.988 | 34.5 | 1.994 |
| 6.86 | 6.65 | 29.96  | 34.5 | 2.086 |
| 6.85 | 6.61 | 29.949 | 34.6 | 2.176 |
| 6.84 | 6.58 | 29.94  | 34.6 | 2.267 |
| 6.83 | 6.56 | 29.932 | 34.7 | 2.358 |
| 6.83 | 6.54 | 29.924 | 34.7 | 2.45  |
| 6.82 | 6.52 | 29.918 | 34.7 | 2.546 |
| 6.82 | 6.5  | 29.904 | 34.8 | 2.65  |
| 6.81 | 6.46 | 29.889 | 34.8 | 2.761 |
| 6.81 | 6.41 | 29.874 | 34.8 | 2.873 |
| 6.8  | 6.37 | 29.867 | 34.9 | 2.99  |
| 6.79 | 6.34 | 29.861 | 34.9 | 3.098 |
| 6.78 | 6.32 | 29.86  | 34.9 | 3.195 |
| 6.77 | 6.31 | 29.856 | 35   | 3.309 |
| 6.76 | 6.29 | 29.849 | 35   | 3.448 |
| 6.76 | 6.26 | 29.841 | 35   | 3.585 |
| 6.75 | 6.23 | 29.834 | 35.1 | 4.462 |
| 6.74 | 6.2  | 29.827 | 35.1 | 4.713 |
| 6.74 | 6.17 | 29.822 | 35.1 | 4.77  |
| 6.73 | 6.14 | 29.819 | 35.2 | 4.856 |
| 6.73 | 6.12 | 29.817 | 35.2 | 4.938 |
| 6.72 | 6.11 | 29.814 | 35.2 | 5.014 |
| 6.72 | 6.09 | 29.811 | 35.3 | 5.099 |
| 6.72 | 6.07 | 29.81  | 35.3 | 5.182 |
| 6.72 | 6.06 | 29.81  | 35.3 | 5.25  |
| 6.72 | 6.05 | 29.81  | 35.3 | 5.357 |
| 6.71 | 6.04 | 29.808 | 35.3 | 5.474 |
| 6.71 | 6.03 | 29.806 | 35.3 | 5.583 |
| 6.71 | 6.01 | 29.803 | 35.4 | 5.665 |
| 6.7  | 5.99 | 29.8   | 35.4 | 5.729 |
| 6.7  | 5.97 | 29.795 | 35.4 | 5.778 |
| 6.69 | 5.93 | 29.788 | 35.4 | 5.83  |
| 6.68 | 5.86 | 29.778 | 35.5 | 5.885 |
| 6.66 | 5.75 | 29.769 | 35.6 | 5.951 |

97

98 Table S22 – P15 site depth profile from 2017 campaign.

| pH   | ODO mg/L | Temp °C | Cond µS/cm | Depth m |
|------|----------|---------|------------|---------|
| 7.09 | 7.03     | 29.972  | 34.9       | 1.12    |
| 7.07 | 6.99     | 29.929  | 34.7       | 1.235   |

|      |      |        |      |       |
|------|------|--------|------|-------|
| 7.05 | 6.96 | 29.907 | 34.5 | 1.4   |
| 7.04 | 6.94 | 29.898 | 34.4 | 1.552 |
| 7.03 | 6.92 | 29.891 | 34.3 | 1.675 |
| 7.02 | 6.9  | 29.887 | 34.2 | 1.776 |
| 7    | 6.89 | 29.884 | 34.1 | 1.9   |
| 7    | 6.89 | 29.88  | 34   | 2.11  |
| 6.99 | 6.88 | 29.874 | 33.9 | 2.314 |
| 6.98 | 6.88 | 29.869 | 33.8 | 2.497 |
| 6.98 | 6.87 | 29.866 | 33.8 | 2.642 |
| 6.98 | 6.86 | 29.863 | 33.8 | 2.775 |
| 6.98 | 6.86 | 29.863 | 33.7 | 2.911 |
| 6.98 | 6.86 | 29.863 | 33.7 | 3.047 |
| 6.97 | 6.86 | 29.866 | 33.7 | 3.171 |
| 6.97 | 6.86 | 29.864 | 33.7 | 3.277 |
| 6.97 | 6.85 | 29.857 | 33.7 | 3.378 |
| 6.97 | 6.85 | 29.849 | 33.6 | 3.479 |
| 6.96 | 6.83 | 29.846 | 33.6 | 3.598 |
| 6.96 | 6.83 | 29.844 | 33.6 | 3.714 |
| 6.95 | 6.82 | 29.843 | 33.7 | 3.827 |
| 6.95 | 6.82 | 29.84  | 33.7 | 3.955 |
| 6.95 | 6.81 | 29.836 | 33.7 | 4.087 |
| 6.95 | 6.81 | 29.831 | 33.7 | 4.208 |
| 6.95 | 6.8  | 29.823 | 33.8 | 4.331 |
| 6.94 | 6.79 | 29.816 | 33.8 | 4.441 |
| 6.94 | 6.78 | 29.813 | 33.8 | 4.54  |
| 6.94 | 6.78 | 29.814 | 33.8 | 4.636 |
| 6.93 | 6.77 | 29.815 | 33.9 | 4.714 |
| 6.93 | 6.77 | 29.815 | 33.9 | 4.782 |
| 6.93 | 6.77 | 29.814 | 33.9 | 4.873 |
| 6.93 | 6.77 | 29.813 | 33.9 | 4.97  |
| 6.93 | 6.77 | 29.811 | 34   | 5.075 |
| 6.93 | 6.77 | 29.809 | 34   | 5.192 |
| 6.92 | 6.76 | 29.807 | 34   | 5.329 |
| 6.92 | 6.76 | 29.808 | 34.1 | 5.483 |
| 6.92 | 6.75 | 29.808 | 34.1 | 5.66  |
| 6.92 | 6.75 | 29.809 | 34.1 | 5.818 |
| 6.92 | 6.75 | 29.81  | 34.1 | 5.976 |
| 6.92 | 6.76 | 29.81  | 34.2 | 6.139 |
| 6.92 | 6.76 | 29.81  | 34.2 | 6.306 |
| 6.92 | 6.76 | 29.81  | 34.2 | 6.461 |
| 6.92 | 6.76 | 29.809 | 34.2 | 6.617 |
| 6.92 | 6.76 | 29.809 | 34.2 | 6.753 |
| 6.92 | 6.76 | 29.808 | 34.3 | 6.888 |
| 6.92 | 6.76 | 29.807 | 34.3 | 7.023 |
| 6.92 | 6.75 | 29.806 | 34.3 | 7.153 |

|      |      |        |      |        |
|------|------|--------|------|--------|
| 6.92 | 6.75 | 29.806 | 34.3 | 7.266  |
| 6.92 | 6.76 | 29.806 | 34.3 | 7.383  |
| 6.92 | 6.75 | 29.806 | 34.3 | 7.493  |
| 6.92 | 6.75 | 29.807 | 34.3 | 7.62   |
| 6.92 | 6.75 | 29.806 | 34.3 | 7.76   |
| 6.92 | 6.74 | 29.805 | 34.3 | 8.611  |
| 6.92 | 6.74 | 29.805 | 34.4 | 8.702  |
| 6.92 | 6.73 | 29.806 | 34.4 | 8.751  |
| 6.92 | 6.73 | 29.806 | 34.4 | 8.833  |
| 6.92 | 6.73 | 29.805 | 34.4 | 8.898  |
| 6.92 | 6.73 | 29.806 | 34.4 | 8.966  |
| 6.91 | 6.73 | 29.806 | 34.4 | 9.038  |
| 6.91 | 6.73 | 29.805 | 34.4 | 9.117  |
| 6.91 | 6.73 | 29.806 | 34.5 | 9.235  |
| 6.91 | 6.72 | 29.806 | 34.5 | 9.396  |
| 6.9  | 6.72 | 29.806 | 34.4 | 9.554  |
| 6.9  | 6.72 | 29.806 | 34.5 | 9.719  |
| 6.9  | 6.72 | 29.806 | 34.5 | 10.579 |
| 6.9  | 6.71 | 29.806 | 34.5 | 10.639 |
| 6.91 | 6.71 | 29.806 | 34.5 | 10.75  |
| 6.91 | 6.71 | 29.806 | 34.5 | 10.854 |
| 6.91 | 6.7  | 29.807 | 34.5 | 10.932 |
| 6.9  | 6.7  | 29.807 | 34.5 | 10.99  |

99

100 Table S23 – P14 site depth profile from 2017 campaign.

| pH   | ODO mg/L | Temp °C | Cond µS/cm | Depth m |
|------|----------|---------|------------|---------|
| 6.84 | 6.67     | 29.657  | 33.1       | 0.448   |
| 6.85 | 6.67     | 29.657  | 33.1       | 0.51    |
| 6.85 | 6.67     | 29.656  | 33.1       | 0.568   |
| 6.85 | 6.67     | 29.656  | 33.1       | 0.602   |
| 6.85 | 6.67     | 29.657  | 33.1       | 0.632   |
| 6.85 | 6.67     | 29.656  | 33.1       | 0.66    |
| 6.84 | 6.67     | 29.656  | 33.1       | 0.672   |
| 6.84 | 6.67     | 29.655  | 33.2       | 0.687   |
| 6.84 | 6.67     | 29.655  | 33.2       | 0.713   |
| 6.85 | 6.67     | 29.655  | 33.2       | 0.749   |
| 6.85 | 6.67     | 29.654  | 33.2       | 0.788   |
| 6.85 | 6.67     | 29.654  | 33.3       | 0.853   |
| 6.84 | 6.67     | 29.653  | 33.3       | 0.929   |
| 6.84 | 6.67     | 29.654  | 33.3       | 0.997   |
| 6.84 | 6.67     | 29.654  | 33.3       | 1.056   |
| 6.84 | 6.67     | 29.654  | 33.4       | 1.109   |



|      |      |        |      |       |
|------|------|--------|------|-------|
| 6.84 | 6.67 | 29.654 | 33.4 | 1.157 |
| 6.84 | 6.67 | 29.653 | 33.4 | 1.189 |
| 6.84 | 6.67 | 29.654 | 33.5 | 1.22  |
| 6.84 | 6.67 | 29.653 | 33.5 | 1.229 |
| 6.83 | 6.67 | 29.653 | 33.6 | 1.227 |
| 6.83 | 6.67 | 29.654 | 33.6 | 1.236 |
| 6.83 | 6.67 | 29.654 | 33.7 | 1.264 |
| 6.83 | 6.67 | 29.654 | 33.7 | 1.325 |
| 6.83 | 6.67 | 29.655 | 33.7 | 1.378 |
| 6.83 | 6.67 | 29.655 | 33.8 | 1.433 |
| 6.83 | 6.67 | 29.655 | 33.8 | 1.481 |
| 6.83 | 6.67 | 29.655 | 33.9 | 1.543 |
| 6.83 | 6.67 | 29.655 | 33.9 | 1.617 |
| 6.83 | 6.67 | 29.656 | 33.9 | 1.696 |
| 6.83 | 6.67 | 29.656 | 34   | 1.771 |
| 6.83 | 6.67 | 29.657 | 34   | 1.842 |
| 6.83 | 6.67 | 29.657 | 34.1 | 1.918 |
| 6.83 | 6.67 | 29.657 | 34.1 | 2.002 |
| 6.83 | 6.67 | 29.656 | 34.1 | 2.861 |
| 6.83 | 6.67 | 29.656 | 34.2 | 2.924 |
| 6.83 | 6.66 | 29.656 | 34.2 | 2.922 |
| 6.83 | 6.66 | 29.655 | 34.2 | 2.852 |
| 6.83 | 6.66 | 29.655 | 34.3 | 2.777 |
| 6.83 | 6.66 | 29.654 | 34.3 | 2.729 |

101

102 Table S24 – P16 site depth profile from 2017 campaign.

| pH   | ODO mg/L | Temp °C | Cond µS/cm | Depth m |
|------|----------|---------|------------|---------|
| 6.8  | 6.65     | 30.465  | 35.4       | 0.337   |
| 6.8  | 6.64     | 30.437  | 35.2       | 0.396   |
| 6.8  | 6.63     | 30.383  | 35         | 0.447   |
| 6.81 | 6.62     | 30.332  | 34.8       | 0.493   |
| 6.81 | 6.61     | 30.329  | 34.7       | 0.538   |
| 6.8  | 6.61     | 30.349  | 34.6       | 0.587   |
| 6.8  | 6.6      | 30.326  | 34.5       | 0.642   |
| 6.8  | 6.59     | 30.249  | 34.4       | 0.702   |
| 6.8  | 6.58     | 30.158  | 34.2       | 0.771   |
| 6.8  | 6.57     | 30.09   | 34.1       | 0.839   |
| 6.8  | 6.55     | 30.04   | 34         | 0.905   |
| 6.79 | 6.53     | 30.012  | 34         | 0.977   |
| 6.78 | 6.5      | 29.985  | 34         | 1.052   |
| 6.77 | 6.49     | 29.963  | 33.9       | 1.137   |
| 6.77 | 6.48     | 29.94   | 33.9       | 1.24    |

|      |      |        |      |       |
|------|------|--------|------|-------|
| 6.76 | 6.47 | 29.919 | 33.9 | 1.349 |
| 6.76 | 6.45 | 29.888 | 33.9 | 1.473 |
| 6.76 | 6.43 | 29.865 | 33.8 | 1.59  |
| 6.75 | 6.42 | 29.851 | 33.8 | 1.702 |
| 6.74 | 6.41 | 29.843 | 33.8 | 1.811 |
| 6.74 | 6.4  | 29.837 | 33.8 | 1.925 |
| 6.73 | 6.4  | 29.834 | 33.8 | 2.032 |
| 6.73 | 6.39 | 29.828 | 33.9 | 2.133 |
| 6.73 | 6.39 | 29.823 | 33.9 | 2.231 |
| 6.74 | 6.38 | 29.822 | 33.9 | 2.328 |
| 6.74 | 6.38 | 29.82  | 33.9 | 2.421 |
| 6.74 | 6.38 | 29.82  | 33.9 | 2.524 |
| 6.75 | 6.38 | 29.824 | 34   | 2.636 |
| 6.75 | 6.38 | 29.83  | 34   | 2.74  |
| 6.74 | 6.38 | 29.834 | 34   | 2.838 |
| 6.74 | 6.38 | 29.839 | 34   | 2.942 |
| 6.74 | 6.38 | 29.841 | 34   | 3.048 |
| 6.74 | 6.38 | 29.834 | 34.1 | 3.158 |
| 6.74 | 6.38 | 29.818 | 34.1 | 3.269 |
| 6.74 | 6.37 | 29.805 | 34.1 | 3.373 |
| 6.74 | 6.36 | 29.802 | 34.2 | 3.48  |
| 6.74 | 6.36 | 29.806 | 34.2 | 3.588 |
| 6.74 | 6.36 | 29.812 | 34.2 | 3.699 |
| 6.73 | 6.36 | 29.809 | 34.2 | 3.822 |
| 6.73 | 6.35 | 29.793 | 34.2 | 3.94  |
| 6.73 | 6.35 | 29.775 | 34.2 | 4.056 |
| 6.72 | 6.34 | 29.756 | 34.2 | 4.184 |
| 6.72 | 6.33 | 29.739 | 34.2 | 4.305 |
| 6.72 | 6.32 | 29.723 | 34.3 | 4.427 |
| 6.73 | 6.31 | 29.699 | 34.3 | 4.545 |
| 6.73 | 6.31 | 29.683 | 34.3 | 4.657 |
| 6.73 | 6.29 | 29.675 | 34.3 | 4.761 |
| 6.72 | 6.28 | 29.674 | 34.3 | 4.866 |
| 6.72 | 6.26 | 29.674 | 34.3 | 4.968 |
| 6.72 | 6.25 | 29.673 | 34.3 | 5.057 |
| 6.72 | 6.24 | 29.67  | 34.4 | 5.148 |
| 6.72 | 6.23 | 29.662 | 34.4 | 5.229 |
| 6.72 | 6.23 | 29.657 | 34.4 | 5.309 |
| 6.72 | 6.22 | 29.656 | 34.4 | 5.373 |
| 6.72 | 6.21 | 29.659 | 34.4 | 5.432 |
| 6.72 | 6.21 | 29.661 | 34.4 | 5.484 |
| 6.72 | 6.21 | 29.666 | 34.4 | 5.548 |
| 6.72 | 6.21 | 29.67  | 34.4 | 5.621 |
| 6.72 | 6.21 | 29.672 | 34.4 | 5.697 |
| 6.72 | 6.21 | 29.667 | 34.4 | 5.771 |

|      |      |        |      |       |
|------|------|--------|------|-------|
| 6.72 | 6.21 | 29.661 | 34.4 | 5.854 |
| 6.72 | 6.2  | 29.657 | 34.4 | 5.939 |
| 6.72 | 6.2  | 29.657 | 34.4 | 6.034 |
| 6.71 | 6.19 | 29.658 | 34.4 | 6.126 |
| 6.71 | 6.19 | 29.66  | 34.4 | 6.161 |
| 6.7  | 6.19 | 29.662 | 34.4 | 6.177 |
| 6.7  | 6.21 | 29.662 | 34.4 | 6.223 |
| 6.69 | 6.21 | 29.659 | 34.4 | 6.284 |
| 6.69 | 6.19 | 29.659 | 34.4 | 6.356 |
| 6.69 | 6.16 | 29.657 | 34.5 | 6.432 |
| 6.7  | 6.15 | 29.654 | 34.5 | 6.508 |
| 6.7  | 6.14 | 29.648 | 34.5 | 6.597 |
| 6.7  | 6.14 | 29.642 | 34.5 | 6.752 |
| 6.7  | 6.14 | 29.635 | 34.5 | 6.877 |
| 6.7  | 6.15 | 29.632 | 34.5 | 6.982 |
| 6.7  | 6.15 | 29.632 | 34.5 | 7.067 |
| 6.7  | 6.15 | 29.632 | 34.5 | 7.149 |
| 6.7  | 6.14 | 29.632 | 34.5 | 7.237 |
| 6.69 | 6.14 | 29.632 | 34.5 | 7.318 |
| 6.69 | 6.15 | 29.631 | 34.5 | 7.394 |
| 6.69 | 6.15 | 29.63  | 34.5 | 7.472 |
| 6.69 | 6.15 | 29.63  | 34.5 | 7.552 |
| 6.69 | 6.16 | 29.63  | 34.5 | 7.636 |
| 6.69 | 6.16 | 29.63  | 34.5 | 7.739 |
| 6.69 | 6.16 | 29.629 | 34.5 | 7.848 |
| 6.69 | 6.16 | 29.628 | 34.5 | 7.972 |
| 6.69 | 6.16 | 29.627 | 34.5 | 8.118 |
| 6.69 | 6.17 | 29.627 | 34.5 | 8.275 |
| 6.69 | 6.17 | 29.628 | 34.5 | 8.437 |
| 6.7  | 6.17 | 29.628 | 34.5 | 8.611 |
| 6.7  | 6.18 | 29.628 | 34.4 | 8.781 |
| 6.71 | 6.18 | 29.628 | 34.5 | 8.93  |
| 6.71 | 6.19 | 29.627 | 34.5 | 9.058 |
| 6.71 | 6.19 | 29.626 | 34.5 | 9.163 |
| 6.72 | 6.2  | 29.625 | 34.4 | 9.25  |
| 6.72 | 6.2  | 29.625 | 34.4 | 9.316 |
| 6.72 | 6.2  | 29.625 | 34.5 | 9.365 |
| 6.72 | 6.2  | 29.626 | 34.5 | 9.421 |
| 6.71 | 6.2  | 29.626 | 34.4 | 9.48  |
| 6.71 | 6.2  | 29.625 | 34.4 | 9.546 |
| 6.71 | 6.2  | 29.624 | 34.4 | 9.626 |
| 6.71 | 6.2  | 29.623 | 34.4 | 9.726 |
| 6.71 | 6.2  | 29.624 | 34.4 | 9.806 |
| 6.71 | 6.2  | 29.624 | 34.4 | 9.908 |
| 6.71 | 6.2  | 29.623 | 34.5 | 10.01 |

|      |      |        |      |        |
|------|------|--------|------|--------|
| 6.71 | 6.21 | 29.622 | 34.4 | 10.11  |
| 6.71 | 6.21 | 29.622 | 34.4 | 10.218 |
| 6.71 | 6.21 | 29.622 | 34.4 | 10.317 |
| 6.71 | 6.21 | 29.622 | 34.5 | 10.402 |
| 6.72 | 6.21 | 29.622 | 34.5 | 10.486 |
| 6.72 | 6.21 | 29.622 | 34.4 | 10.593 |
| 6.71 | 6.2  | 29.621 | 34.5 | 10.712 |
| 6.71 | 6.2  | 29.621 | 34.5 | 10.842 |
| 6.71 | 6.2  | 29.62  | 34.5 | 10.974 |
| 6.71 | 6.2  | 29.619 | 34.4 | 11.839 |
| 6.71 | 6.21 | 29.619 | 34.4 | 11.939 |
| 6.71 | 6.21 | 29.618 | 34.5 | 11.905 |
| 6.71 | 6.21 | 29.616 | 34.5 | 11.956 |
| 6.71 | 6.21 | 29.615 | 34.5 | 12.009 |
| 6.71 | 6.21 | 29.614 | 34.5 | 12.065 |
| 6.71 | 6.21 | 29.613 | 34.4 | 12.134 |
| 6.71 | 6.21 | 29.611 | 34.4 | 12.196 |
| 6.7  | 6.2  | 29.607 | 34.5 | 12.257 |
| 6.7  | 6.18 | 29.604 | 34.5 | 12.358 |
| 6.69 | 6.16 | 29.601 | 34.5 | 12.463 |
| 6.69 | 6.14 | 29.601 | 34.5 | 12.565 |
| 6.68 | 6.13 | 29.598 | 34.5 | 12.663 |
| 6.68 | 6.11 | 29.595 | 34.5 | 12.762 |
| 6.67 | 6.08 | 29.586 | 34.6 | 12.862 |
| 6.66 | 6.01 | 29.57  | 34.6 | 12.976 |
| 6.64 | 5.88 | 29.555 | 34.7 | 13.063 |
| 6.62 | 5.75 | 29.546 | 34.8 | 13.183 |
| 6.6  | 5.67 | 29.545 | 34.8 | 13.306 |
| 6.58 | 5.64 | 29.545 | 34.8 | 13.441 |
| 6.57 | 5.63 | 29.545 | 34.8 | 13.582 |
| 6.57 | 5.63 | 29.55  | 34.8 | 13.724 |
| 6.57 | 5.65 | 29.555 | 34.8 | 13.832 |
| 6.57 | 5.69 | 29.56  | 34.7 | 13.957 |
| 6.57 | 5.69 | 29.555 | 34.7 | 14.106 |
| 6.56 | 5.62 | 29.54  | 34.8 | 14.247 |
| 6.55 | 5.52 | 29.526 | 34.9 | 14.391 |
| 6.54 | 5.46 | 29.52  | 34.9 | 14.54  |
| 6.52 | 5.43 | 29.516 | 34.9 | 15.477 |
| 6.51 | 5.39 | 29.507 | 34.9 | 15.554 |
| 6.5  | 5.33 | 29.504 | 34.9 | 15.655 |
| 6.49 | 5.29 | 29.501 | 34.9 | 15.748 |
| 6.48 | 5.27 | 29.498 | 34.9 | 15.838 |
| 6.48 | 5.24 | 29.494 | 35   | 15.94  |
| 6.47 | 5.23 | 29.491 | 35   | 16.032 |
| 6.47 | 5.21 | 29.491 | 35   | 16.117 |

|      |      |        |      |        |
|------|------|--------|------|--------|
| 6.47 | 5.2  | 29.491 | 34.9 | 16.23  |
| 6.47 | 5.2  | 29.493 | 34.9 | 16.404 |
| 6.47 | 5.2  | 29.491 | 35   | 16.549 |
| 6.46 | 5.19 | 29.486 | 35   | 16.683 |
| 6.46 | 5.17 | 29.477 | 35   | 16.815 |
| 6.46 | 5.15 | 29.473 | 35   | 16.925 |
| 6.45 | 5.13 | 29.473 | 35   | 17.051 |
| 6.45 | 5.13 | 29.469 | 35   | 17.186 |
| 6.45 | 5.11 | 29.46  | 35.1 | 17.324 |
| 6.44 | 5.07 | 29.448 | 35   | 17.947 |
| 6.43 | 5.04 | 29.44  | 35   | 18.037 |
| 6.43 | 5.01 | 29.436 | 35   | 18.148 |
| 6.43 | 5    | 29.429 | 35.1 | 18.281 |
| 6.43 | 4.97 | 29.41  | 35.1 | 18.399 |
| 6.42 | 4.88 | 29.376 | 35.2 | 18.513 |
| 6.4  | 4.53 | 29.34  | 35.2 | 19.16  |

103

104 Table S25 – P17 site depth profile from 2017 campaign.

| pH   | ODO mg/L | Temp °C | Cond µS/cm | Depth m |
|------|----------|---------|------------|---------|
| 6.94 | 7.09     | 30.432  | 36.6       | 0.215   |
| 6.94 | 6.99     | 30.047  | 36.3       | 0.345   |
| 6.92 | 6.91     | 29.839  | 36         | 0.496   |
| 6.89 | 6.85     | 29.729  | 35.9       | 0.626   |
| 6.86 | 6.71     | 29.696  | 35.8       | 0.759   |
| 6.83 | 6.63     | 29.672  | 35.7       | 0.893   |
| 6.8  | 6.55     | 29.647  | 35.6       | 1.049   |
| 6.78 | 6.5      | 29.624  | 35.5       | 1.21    |
| 6.76 | 6.45     | 29.607  | 35.4       | 1.362   |
| 6.75 | 6.41     | 29.593  | 35.4       | 1.506   |
| 6.74 | 6.38     | 29.584  | 35.3       | 1.65    |
| 6.74 | 6.36     | 29.577  | 35.2       | 1.798   |
| 6.73 | 6.35     | 29.57   | 35.2       | 1.969   |
| 6.73 | 6.33     | 29.564  | 35.2       | 2.109   |
| 6.72 | 6.31     | 29.56   | 35.1       | 2.23    |
| 6.72 | 6.3      | 29.557  | 35.1       | 2.341   |
| 6.71 | 6.28     | 29.553  | 35         | 2.438   |
| 6.7  | 6.27     | 29.548  | 35         | 2.534   |
| 6.7  | 6.25     | 29.545  | 35         | 2.632   |
| 6.7  | 6.24     | 29.542  | 34.9       | 2.725   |
| 6.7  | 6.22     | 29.539  | 34.9       | 2.803   |
| 6.7  | 6.21     | 29.536  | 34.9       | 2.894   |
| 6.69 | 6.2      | 29.533  | 34.8       | 2.995   |

|      |      |        |      |       |
|------|------|--------|------|-------|
| 6.69 | 6.19 | 29.531 | 34.8 | 3.094 |
| 6.69 | 6.18 | 29.529 | 34.8 | 3.197 |
| 6.69 | 6.17 | 29.527 | 34.8 | 3.292 |
| 6.69 | 6.16 | 29.525 | 34.7 | 3.38  |
| 6.69 | 6.16 | 29.522 | 34.7 | 3.47  |
| 6.69 | 6.14 | 29.503 | 34.7 | 3.561 |
| 6.68 | 6.1  | 29.486 | 34.7 | 3.645 |
| 6.68 | 6.05 | 29.464 | 34.7 | 3.729 |
| 6.67 | 5.99 | 29.444 | 34.7 | 3.816 |
| 6.66 | 5.94 | 29.431 | 34.7 | 3.9   |
| 6.66 | 5.89 | 29.42  | 34.7 | 3.988 |
| 6.65 | 5.86 | 29.415 | 34.7 | 4.086 |
| 6.65 | 5.84 | 29.423 | 34.7 | 4.184 |
| 6.64 | 5.83 | 29.434 | 34.7 | 4.287 |
| 6.64 | 5.83 | 29.427 | 34.7 | 4.389 |
| 6.63 | 5.8  | 29.412 | 34.7 | 4.489 |
| 6.62 | 5.76 | 29.403 | 34.7 | 4.584 |
| 6.61 | 5.74 | 29.397 | 34.7 | 4.678 |
| 6.61 | 5.72 | 29.389 | 34.7 | 4.765 |
| 6.61 | 5.7  | 29.384 | 34.7 | 4.846 |
| 6.61 | 5.69 | 29.384 | 34.7 | 4.927 |
| 6.61 | 5.69 | 29.386 | 34.7 | 5.002 |
| 6.61 | 5.69 | 29.388 | 34.6 | 5.081 |
| 6.62 | 5.69 | 29.386 | 34.7 | 5.156 |
| 6.62 | 5.69 | 29.382 | 34.6 | 5.229 |
| 6.62 | 5.69 | 29.378 | 34.6 | 5.304 |
| 6.62 | 5.68 | 29.377 | 34.6 | 5.384 |
| 6.62 | 5.67 | 29.375 | 34.6 | 5.464 |
| 6.61 | 5.67 | 29.375 | 34.6 | 5.545 |
| 6.61 | 5.66 | 29.373 | 34.6 | 5.626 |
| 6.61 | 5.66 | 29.373 | 34.6 | 5.706 |
| 6.61 | 5.66 | 29.372 | 34.6 | 5.788 |
| 6.61 | 5.65 | 29.372 | 34.6 | 5.871 |

105

106 Table S26 – P18 site depth profile from 2017 campaign.

| pH   | ODO mg/L | Temp °C | Cond µS/cm | Depth m |
|------|----------|---------|------------|---------|
| 6.7  | 6.26     | 29.64   | 34.2       | 0.978   |
| 6.68 | 6.21     | 29.581  | 34.1       | 0.966   |
| 6.68 | 6.16     | 29.534  | 34.1       | 0.967   |
| 6.67 | 6.14     | 29.527  | 34.1       | 0.964   |
| 6.66 | 6.12     | 29.515  | 34.1       | 1.084   |
| 6.65 | 6.08     | 29.49   | 34         | 1.196   |

|      |      |        |      |       |
|------|------|--------|------|-------|
| 6.64 | 6.01 | 29.454 | 34   | 2.034 |
| 6.63 | 5.94 | 29.426 | 33.9 | 2.033 |
| 6.61 | 5.89 | 29.41  | 33.8 | 2.139 |
| 6.61 | 5.86 | 29.41  | 33.8 | 2.29  |
| 6.6  | 5.86 | 29.414 | 33.7 | 2.361 |
| 6.6  | 5.85 | 29.415 | 33.6 | 2.425 |
| 6.6  | 5.85 | 29.413 | 33.5 | 2.531 |
| 6.6  | 5.84 | 29.41  | 33.4 | 2.607 |
| 6.6  | 5.84 | 29.408 | 33.4 | 3.492 |
| 6.6  | 5.83 | 29.406 | 33.3 | 3.612 |
| 6.6  | 5.82 | 29.407 | 33.2 | 3.612 |
| 6.6  | 5.81 | 29.409 | 33.1 | 3.611 |
| 6.59 | 5.81 | 29.409 | 33.1 | 3.767 |
| 6.59 | 5.8  | 29.406 | 33.1 | 3.862 |
| 6.6  | 5.8  | 29.401 | 33.1 | 3.921 |
| 6.6  | 5.79 | 29.401 | 33   | 3.983 |
| 6.59 | 5.79 | 29.402 | 33   | 4.071 |
| 6.6  | 5.79 | 29.404 | 33   | 4.197 |
| 6.6  | 5.79 | 29.406 | 33   | 4.333 |
| 6.59 | 5.79 | 29.408 | 33   | 5.268 |
| 6.59 | 5.78 | 29.409 | 32.9 | 5.263 |
| 6.6  | 5.78 | 29.41  | 32.9 | 5.264 |
| 6.6  | 5.78 | 29.409 | 33   | 5.325 |
| 6.6  | 5.78 | 29.409 | 32.9 | 5.43  |
| 6.6  | 5.78 | 29.412 | 32.9 | 5.486 |
| 6.6  | 5.79 | 29.423 | 33   | 5.521 |
| 6.6  | 5.79 | 29.435 | 33   | 5.594 |
| 6.6  | 5.79 | 29.442 | 33   | 5.706 |
| 6.61 | 5.8  | 29.445 | 33   | 5.838 |
| 6.61 | 5.8  | 29.446 | 33.1 | 5.975 |
| 6.6  | 5.8  | 29.447 | 33.1 | 6.098 |
| 6.6  | 5.8  | 29.448 | 33.1 | 6.227 |
| 6.6  | 5.81 | 29.45  | 33.1 | 6.357 |
| 6.6  | 5.81 | 29.448 | 33.2 | 7.172 |
| 6.59 | 5.8  | 29.441 | 33.2 | 7.171 |
| 6.58 | 5.8  | 29.422 | 33.2 | 7.165 |
| 6.58 | 5.78 | 29.399 | 33.2 | 7.18  |
| 6.56 | 5.75 | 29.367 | 33.3 | 7.329 |
| 6.54 | 5.7  | 29.341 | 33.3 | 7.418 |
| 6.52 | 5.66 | 29.329 | 33.3 | 7.475 |
| 6.49 | 5.64 | 29.326 | 33.4 | 8.308 |
| 6.48 | 5.63 | 29.323 | 33.4 | 8.301 |
| 6.47 | 5.62 | 29.323 | 33.4 | 8.303 |
| 6.46 | 5.61 | 29.322 | 33.5 | 8.408 |
| 6.45 | 5.6  | 29.321 | 33.5 | 8.524 |

|      |      |        |      |        |
|------|------|--------|------|--------|
| 6.45 | 5.6  | 29.32  | 33.5 | 8.593  |
| 6.45 | 5.59 | 29.32  | 33.6 | 9.39   |
| 6.44 | 5.59 | 29.319 | 33.6 | 9.396  |
| 6.43 | 5.58 | 29.317 | 33.7 | 9.396  |
| 6.42 | 5.58 | 29.316 | 33.7 | 9.4    |
| 6.41 | 5.57 | 29.315 | 33.8 | 9.472  |
| 6.4  | 5.57 | 29.314 | 33.8 | 9.584  |
| 6.39 | 5.56 | 29.313 | 33.8 | 9.653  |
| 6.38 | 5.56 | 29.312 | 33.8 | 9.702  |
| 6.37 | 5.56 | 29.312 | 33.9 | 9.752  |
| 6.36 | 5.56 | 29.312 | 33.9 | 9.884  |
| 6.36 | 5.56 | 29.312 | 33.9 | 9.999  |
| 6.36 | 5.55 | 29.312 | 33.9 | 10.143 |
| 6.35 | 5.55 | 29.312 | 33.9 | 10.89  |
| 6.34 | 5.55 | 29.311 | 34   | 10.899 |
| 6.34 | 5.55 | 29.31  | 34   | 10.893 |
| 6.33 | 5.55 | 29.31  | 34   | 10.891 |
| 6.33 | 5.54 | 29.309 | 34   | 10.918 |
| 6.33 | 5.54 | 29.309 | 34   | 11.016 |
| 6.32 | 5.54 | 29.308 | 34   | 11.081 |
| 6.32 | 5.54 | 29.308 | 34.1 | 11.128 |
| 6.32 | 5.53 | 29.307 | 34.1 | 11.174 |
| 6.32 | 5.53 | 29.304 | 34.1 | 12.023 |
| 6.31 | 5.52 | 29.3   | 34.1 | 12.019 |
| 6.29 | 5.51 | 29.297 | 34.2 | 12.018 |
| 6.28 | 5.5  | 29.296 | 34.2 | 12.016 |
| 6.27 | 5.49 | 29.296 | 34.2 | 12.014 |
| 6.28 | 5.49 | 29.298 | 34.2 | 12.013 |
| 6.29 | 5.49 | 29.298 | 34.2 | 12.011 |
| 6.29 | 5.49 | 29.293 | 34.2 | 12.072 |
| 6.28 | 5.48 | 29.289 | 34.2 | 12.141 |
| 6.26 | 5.47 | 29.286 | 34.2 | 12.216 |
| 6.24 | 5.47 | 29.288 | 34.3 | 12.296 |
| 6.23 | 5.47 | 29.287 | 34.3 | 12.373 |
| 6.24 | 5.46 | 29.284 | 34.3 | 12.47  |
| 6.23 | 5.45 | 29.281 | 34.2 | 12.611 |
| 6.22 | 5.44 | 29.277 | 34.2 | 12.735 |
| 6.22 | 5.43 | 29.277 | 34.3 | 12.8   |
| 6.21 | 5.43 | 29.277 | 34.3 | 12.865 |
| 6.22 | 5.42 | 29.278 | 34.3 | 12.927 |
| 6.23 | 5.42 | 29.279 | 34.3 | 13.038 |
| 6.22 | 5.42 | 29.28  | 34.3 | 13.176 |
| 6.22 | 5.43 | 29.281 | 34.3 | 13.265 |
| 6.22 | 5.43 | 29.281 | 34.3 | 13.341 |
| 6.22 | 5.43 | 29.28  | 34.3 | 13.418 |



|      |      |        |      |        |
|------|------|--------|------|--------|
| 6.23 | 5.42 | 29.279 | 34.3 | 13.498 |
| 6.25 | 5.42 | 29.278 | 34.3 | 13.576 |
| 6.26 | 5.42 | 29.277 | 34.3 | 13.702 |
| 6.25 | 5.41 | 29.278 | 34.3 | 13.79  |
| 6.24 | 5.41 | 29.279 | 34.3 | 13.878 |
| 6.23 | 5.41 | 29.28  | 34.3 | 13.968 |
| 6.23 | 5.42 | 29.281 | 34.3 | 14.054 |
| 6.24 | 5.42 | 29.281 | 34.3 | 14.14  |
| 6.26 | 5.42 | 29.28  | 34.3 | 14.226 |
| 6.27 | 5.42 | 29.279 | 34.3 | 14.311 |
| 6.27 | 5.41 | 29.278 | 34.3 | 14.386 |
| 6.26 | 5.41 | 29.277 | 34.3 | 14.463 |
| 6.25 | 5.4  | 29.275 | 34.3 | 14.538 |
| 6.23 | 5.4  | 29.271 | 34.3 | 15.477 |
| 6.22 | 5.39 | 29.269 | 34.3 | 15.475 |
| 6.22 | 5.38 | 29.268 | 34.3 | 15.476 |
| 6.22 | 5.37 | 29.267 | 34.3 | 15.478 |
| 6.23 | 5.37 | 29.267 | 34.3 | 15.482 |
| 6.24 | 5.36 | 29.267 | 34.3 | 15.486 |
| 6.26 | 5.36 | 29.267 | 34.3 | 15.501 |
| 6.26 | 5.36 | 29.269 | 34.3 | 15.584 |
| 6.26 | 5.37 | 29.27  | 34.3 | 15.682 |
| 6.26 | 5.37 | 29.271 | 34.3 | 15.787 |
| 6.25 | 5.38 | 29.27  | 34.3 | 16.864 |
| 6.24 | 5.37 | 29.268 | 34.3 | 16.896 |
| 6.24 | 5.36 | 29.267 | 34.3 | 16.899 |
| 6.25 | 5.36 | 29.266 | 34.3 | 16.899 |
| 6.24 | 5.36 | 29.264 | 34.4 | 16.999 |
| 6.23 | 5.35 | 29.261 | 34.3 | 17.143 |
| 6.23 | 5.34 | 29.26  | 34.3 | 17.236 |
| 6.22 | 5.33 | 29.259 | 34.3 | 18.29  |
| 6.21 | 5.33 | 29.26  | 34.3 | 18.433 |
| 6.2  | 5.32 | 29.26  | 34.3 | 18.433 |
| 6.21 | 5.32 | 29.261 | 34.3 | 18.434 |
| 6.2  | 5.32 | 29.261 | 34.3 | 18.539 |
| 6.2  | 5.32 | 29.26  | 34.3 | 18.685 |
| 6.2  | 5.32 | 29.255 | 34.3 | 18.775 |
| 6.2  | 5.31 | 29.251 | 34.4 | 18.831 |
| 6.2  | 5.3  | 29.247 | 34.4 | 18.871 |
| 6.2  | 5.29 | 29.247 | 34.3 | 20.133 |
| 6.2  | 5.28 | 29.246 | 34.3 | 20.136 |
| 6.19 | 5.27 | 29.244 | 34.3 | 20.148 |
| 6.19 | 5.27 | 29.245 | 34.4 | 20.159 |
| 6.18 | 5.27 | 29.244 | 34.4 | 21.108 |
| 6.17 | 5.26 | 29.236 | 34.3 | 21.121 |

|      |      |        |      |        |
|------|------|--------|------|--------|
| 6.17 | 5.24 | 29.226 | 34.3 | 21.126 |
| 6.16 | 5.22 | 29.223 | 34.4 | 21.159 |
| 6.15 | 5.22 | 29.229 | 34.4 | 21.352 |
| 6.15 | 5.22 | 29.236 | 34.3 | 21.465 |
| 6.15 | 5.22 | 29.241 | 34.3 | 21.535 |
| 6.16 | 5.23 | 29.243 | 34.4 | 21.584 |
| 6.17 | 5.23 | 29.243 | 34.4 | 21.626 |
| 6.18 | 5.23 | 29.243 | 34.4 | 22.544 |
| 6.18 | 5.24 | 29.242 | 34.4 | 22.276 |
| 6.19 | 5.24 | 29.241 | 34.3 | 22.274 |
| 6.18 | 5.24 | 29.241 | 34.3 | 22.43  |
| 6.17 | 5.24 | 29.237 | 34.3 | 22.557 |
| 6.17 | 5.23 | 29.235 | 34.3 | 22.626 |
| 6.17 | 5.23 | 29.235 | 34.3 | 22.683 |
| 6.16 | 5.22 | 29.235 | 34.3 | 23.534 |
| 6.16 | 5.22 | 29.231 | 34.3 | 23.52  |
| 6.16 | 5.21 | 29.228 | 34.3 | 23.52  |
| 6.16 | 5.21 | 29.226 | 34.3 | 23.521 |
| 6.16 | 5.2  | 29.223 | 34.4 | 23.525 |
| 6.18 | 5.19 | 29.221 | 34.4 | 23.531 |
| 6.19 | 5.19 | 29.22  | 34.4 | 23.534 |
| 6.2  | 5.18 | 29.219 | 34.3 | 24.404 |
| 6.19 | 5.18 | 29.215 | 34.3 | 24.386 |
| 6.18 | 5.17 | 29.208 | 34.3 | 24.399 |
| 6.17 | 5.15 | 29.202 | 34.3 | 24.399 |
| 6.16 | 5.14 | 29.193 | 34.3 | 24.435 |
| 6.15 | 5.09 | 29.173 | 34.3 | 24.571 |
| 6.14 | 5.04 | 29.153 | 34.3 | 24.651 |
| 6.14 | 4.99 | 29.152 | 34.3 | 24.704 |
| 6.14 | 4.97 | 29.159 | 34.3 | 24.742 |
| 6.15 | 4.97 | 29.168 | 34.3 | 24.818 |
| 6.15 | 4.98 | 29.167 | 34.3 | 25.583 |
| 6.15 | 4.99 | 29.16  | 34.3 | 25.592 |
| 6.15 | 4.98 | 29.153 | 34.3 | 25.591 |
| 6.14 | 4.97 | 29.153 | 34.3 | 25.591 |
| 6.13 | 4.97 | 29.154 | 34.3 | 25.678 |
| 6.13 | 4.97 | 29.156 | 34.3 | 25.791 |
| 6.13 | 4.97 | 29.157 | 34.3 | 25.866 |
| 6.13 | 4.97 | 29.157 | 34.3 | 26.841 |
| 6.11 | 4.97 | 29.155 | 34.3 | 26.87  |
| 6.11 | 4.97 | 29.153 | 34.3 | 26.877 |
| 6.11 | 4.96 | 29.152 | 34.3 | 26.879 |
| 6.1  | 4.96 | 29.145 | 34.3 | 27.007 |
| 6.09 | 4.94 | 29.134 | 34.3 | 27.124 |
| 6.09 | 4.91 | 29.126 | 34.2 | 27.193 |

|      |      |        |      |        |
|------|------|--------|------|--------|
| 6.1  | 4.89 | 29.129 | 34.2 | 27.242 |
| 6.11 | 4.88 | 29.138 | 34.2 | 27.279 |
| 6.11 | 4.89 | 29.139 | 34.2 | 28.141 |
| 6.11 | 4.9  | 29.133 | 34.2 | 28.143 |
| 6.12 | 4.89 | 29.129 | 34.2 | 28.142 |
| 6.11 | 4.88 | 29.129 | 34.2 | 28.269 |
| 6.11 | 4.87 | 29.128 | 34.2 | 28.402 |
| 6.11 | 4.87 | 29.128 | 34.2 | 28.479 |
| 6.1  | 4.87 | 29.127 | 34.2 | 29.464 |
| 6.1  | 4.86 | 29.126 | 34.2 | 29.465 |
| 6.1  | 4.86 | 29.125 | 34.2 | 29.458 |
| 6.11 | 4.86 | 29.126 | 34.2 | 29.457 |
| 6.1  | 4.86 | 29.126 | 34.2 | 29.606 |
| 6.11 | 4.86 | 29.126 | 34.2 | 29.696 |
| 6.12 | 4.86 | 29.127 | 34.2 | 30.576 |
| 6.11 | 4.86 | 29.127 | 34.2 | 30.67  |
| 6.1  | 4.86 | 29.126 | 34.2 | 30.666 |
| 6.11 | 4.86 | 29.126 | 34.2 | 30.678 |
| 6.1  | 4.85 | 29.124 | 34.2 | 30.868 |
| 6.1  | 4.85 | 29.125 | 34.2 | 30.97  |
| 6.11 | 4.85 | 29.126 | 34.2 | 31.035 |
| 6.1  | 4.85 | 29.128 | 34.2 | 31.929 |
| 6.1  | 4.86 | 29.129 | 34.2 | 31.922 |
| 6.11 | 4.86 | 29.131 | 34.2 | 31.907 |
| 6.11 | 4.87 | 29.132 | 34.2 | 31.968 |
| 6.11 | 4.87 | 29.133 | 34.2 | 32.097 |
| 6.12 | 4.87 | 29.133 | 34.2 | 32.175 |
| 6.13 | 4.87 | 29.134 | 34.2 | 32.223 |
| 6.13 | 4.88 | 29.135 | 34.2 | 33.223 |
| 6.13 | 4.88 | 29.135 | 34.2 | 33.251 |
| 6.13 | 4.88 | 29.134 | 34.2 | 33.254 |
| 6.13 | 4.87 | 29.129 | 34.2 | 33.253 |
| 6.13 | 4.85 | 29.122 | 34.2 | 33.256 |
| 6.14 | 4.84 | 29.119 | 34.2 | 33.262 |
| 6.15 | 4.83 | 29.123 | 34.2 | 33.269 |
| 6.15 | 4.84 | 29.129 | 34.2 | 34.022 |
| 6.15 | 4.85 | 29.133 | 34.2 | 34.034 |
| 6.15 | 4.87 | 29.134 | 34.2 | 34.045 |
| 6.15 | 4.87 | 29.133 | 34.2 | 34.094 |
| 6.14 | 4.86 | 29.129 | 34.2 | 34.263 |
| 6.14 | 4.85 | 29.125 | 34.2 | 34.373 |
| 6.14 | 4.84 | 29.124 | 34.2 | 34.448 |
| 6.14 | 4.83 | 29.123 | 34.2 | 35.556 |
| 6.13 | 4.83 | 29.12  | 34.2 | 35.61  |
| 6.13 | 4.82 | 29.115 | 34.2 | 35.606 |

|      |      |        |      |        |
|------|------|--------|------|--------|
| 6.14 | 4.8  | 29.113 | 34.2 | 35.607 |
| 6.14 | 4.8  | 29.114 | 34.2 | 35.611 |
| 6.14 | 4.8  | 29.116 | 34.2 | 36.535 |
| 6.14 | 4.8  | 29.118 | 34.2 | 36.541 |
| 6.14 | 4.8  | 29.118 | 34.2 | 36.555 |
| 6.14 | 4.8  | 29.117 | 34.2 | 36.564 |
| 6.14 | 4.8  | 29.118 | 34.2 | 37.415 |
| 6.14 | 4.81 | 29.119 | 34.2 | 37.423 |
| 6.14 | 4.81 | 29.122 | 34.2 | 37.425 |
| 6.15 | 4.81 | 29.122 | 34.2 | 37.457 |
| 6.14 | 4.81 | 29.12  | 34.2 | 38.396 |
| 6.14 | 4.81 | 29.117 | 34.2 | 38.392 |
| 6.15 | 4.8  | 29.115 | 34.2 | 38.395 |
| 6.14 | 4.79 | 29.114 | 34.2 | 39.22  |
| 6.14 | 4.78 | 29.112 | 34.2 | 39.212 |
| 6.14 | 4.78 | 29.112 | 34.2 | 39.216 |
| 6.13 | 4.78 | 29.112 | 34.2 | 40.042 |
| 6.12 | 4.77 | 29.113 | 34.2 | 40.043 |
| 6.13 | 4.77 | 29.113 | 34.2 | 40.045 |
| 6.13 | 4.78 | 29.114 | 34.2 | 40.048 |
| 6.13 | 4.78 | 29.114 | 34.2 | 40.836 |
| 6.13 | 4.78 | 29.114 | 34.2 | 40.841 |
| 6.14 | 4.78 | 29.114 | 34.2 | 40.842 |
| 6.14 | 4.78 | 29.114 | 34.2 | 40.845 |
| 6.15 | 4.78 | 29.114 | 34.2 | 40.848 |
| 6.17 | 4.78 | 29.114 | 34.2 | 40.851 |
| 6.17 | 4.78 | 29.113 | 34.2 | 41.627 |
| 6.17 | 4.77 | 29.113 | 34.2 | 41.635 |
| 6.17 | 4.77 | 29.113 | 34.2 | 41.632 |
| 6.17 | 4.77 | 29.113 | 34.2 | 42.365 |
| 6.16 | 4.77 | 29.112 | 34.2 | 42.365 |
| 6.16 | 4.77 | 29.111 | 34.2 | 42.363 |
| 6.15 | 4.76 | 29.11  | 34.2 | 43.138 |
| 6.14 | 4.76 | 29.11  | 34.2 | 43.129 |
| 6.14 | 4.76 | 29.111 | 34.2 | 43.119 |
| 6.14 | 4.76 | 29.112 | 34.2 | 43.109 |
| 6.14 | 4.76 | 29.112 | 34.2 | 43.835 |
| 6.15 | 4.76 | 29.112 | 34.2 | 43.826 |
| 6.15 | 4.76 | 29.112 | 34.2 | 43.817 |
| 6.16 | 4.76 | 29.112 | 34.2 | 43.814 |
| 6.15 | 4.76 | 29.109 | 34.2 | 44.56  |
| 6.15 | 4.75 | 29.106 | 34.2 | 44.544 |
| 6.15 | 4.75 | 29.105 | 34.2 | 44.545 |
| 6.14 | 4.74 | 29.105 | 34.2 | 45.354 |
| 6.14 | 4.74 | 29.105 | 34.2 | 45.403 |

|      |      |        |      |        |
|------|------|--------|------|--------|
| 6.14 | 4.74 | 29.104 | 34.2 | 45.409 |
| 6.13 | 4.74 | 29.103 | 34.2 | 45.453 |
| 6.12 | 4.73 | 29.099 | 34.2 | 45.609 |
| 6.13 | 4.72 | 29.097 | 34.2 | 45.696 |
| 6.13 | 4.72 | 29.096 | 34.2 | 46.471 |
| 6.13 | 4.71 | 29.096 | 34.2 | 46.486 |
| 6.13 | 4.71 | 29.096 | 34.2 | 46.483 |
| 6.13 | 4.71 | 29.096 | 34.2 | 46.487 |
| 6.13 | 4.71 | 29.096 | 34.2 | 46.623 |
| 6.14 | 4.71 | 29.096 | 34.2 | 46.699 |
| 6.14 | 4.71 | 29.096 | 34.2 | 46.746 |
| 6.14 | 4.71 | 29.096 | 34.2 | 46.85  |
| 6.14 | 4.7  | 29.096 | 34.2 | 46.932 |
| 6.15 | 4.7  | 29.096 | 34.2 | 47.055 |
| 6.15 | 4.7  | 29.096 | 34.2 | 47.17  |
| 6.15 | 4.7  | 29.096 | 34.2 | 47.979 |
| 6.16 | 4.7  | 29.095 | 34.2 | 47.981 |
| 6.16 | 4.7  | 29.096 | 34.2 | 48.07  |
| 6.16 | 4.7  | 29.096 | 34.2 | 48.261 |
| 6.16 | 4.7  | 29.096 | 34.2 | 48.357 |
| 6.16 | 4.7  | 29.097 | 34.2 | 48.414 |
| 6.15 | 4.7  | 29.096 | 34.2 | 49.271 |
| 6.16 | 4.7  | 29.096 | 34.2 | 49.255 |
| 6.16 | 4.7  | 29.096 | 34.2 | 49.241 |
| 6.16 | 4.7  | 29.096 | 34.2 | 49.385 |
| 6.16 | 4.7  | 29.096 | 34.2 | 49.518 |
| 6.17 | 4.7  | 29.095 | 34.2 | 49.584 |
| 6.17 | 4.7  | 29.095 | 34.2 | 50.497 |
| 6.17 | 4.69 | 29.095 | 34.2 | 50.478 |
| 6.17 | 4.69 | 29.094 | 34.2 | 50.479 |
| 6.17 | 4.69 | 29.094 | 34.2 | 50.607 |
| 6.16 | 4.69 | 29.093 | 34.2 | 50.745 |
| 6.16 | 4.68 | 29.093 | 34.1 | 50.818 |
| 6.16 | 4.68 | 29.093 | 34.2 | 50.872 |
| 6.16 | 4.68 | 29.094 | 34.2 | 51.757 |
| 6.16 | 4.67 | 29.093 | 34.2 | 51.77  |
| 6.16 | 4.67 | 29.092 | 34.2 | 51.802 |
| 6.16 | 4.66 | 29.092 | 34.2 | 51.821 |
| 6.17 | 4.66 | 29.092 | 34.2 | 51.831 |
| 6.18 | 4.66 | 29.093 | 34.2 | 51.838 |
| 6.18 | 4.66 | 29.093 | 34.2 | 52.623 |
| 6.18 | 4.66 | 29.092 | 34.2 | 52.573 |
| 6.19 | 4.66 | 29.092 | 34.2 | 52.578 |
| 6.19 | 4.66 | 29.092 | 34.2 | 52.58  |
| 6.19 | 4.66 | 29.092 | 34.2 | 52.581 |

|      |      |        |      |        |
|------|------|--------|------|--------|
| 6.2  | 4.66 | 29.092 | 34.2 | 52.585 |
| 6.2  | 4.66 | 29.093 | 34.2 | 52.591 |
| 6.21 | 4.66 | 29.092 | 34.2 | 52.598 |
| 6.21 | 4.66 | 29.092 | 34.2 | 52.606 |
| 6.22 | 4.66 | 29.092 | 34.2 | 52.617 |
| 6.22 | 4.65 | 29.092 | 34.2 | 52.629 |
| 6.23 | 4.65 | 29.092 | 34.2 | 52.64  |
| 6.23 | 4.65 | 29.093 | 34.2 | 52.652 |
| 6.24 | 4.65 | 29.093 | 34.2 | 52.664 |
| 6.24 | 4.65 | 29.093 | 34.2 | 52.675 |
| 6.25 | 4.66 | 29.092 | 34.2 | 52.686 |
| 6.25 | 4.66 | 29.093 | 34.2 | 52.694 |
| 6.25 | 4.66 | 29.093 | 34.2 | 52.7   |
| 6.26 | 4.66 | 29.093 | 34.2 | 52.706 |
| 6.26 | 4.66 | 29.093 | 34.2 | 52.713 |
| 6.26 | 4.66 | 29.093 | 34.2 | 52.717 |
| 6.26 | 4.66 | 29.093 | 34.2 | 52.718 |
| 6.26 | 4.66 | 29.093 | 34.1 | 52.716 |
| 6.27 | 4.66 | 29.092 | 34.1 | 52.715 |
| 6.27 | 4.66 | 29.092 | 34.2 | 53.507 |
| 6.26 | 4.65 | 29.092 | 34.2 | 53.535 |
| 6.26 | 4.65 | 29.092 | 34.2 | 53.547 |
| 6.26 | 4.65 | 29.091 | 34.2 | 53.691 |
| 6.25 | 4.65 | 29.089 | 34.2 | 53.833 |
| 6.25 | 4.64 | 29.087 | 34.2 | 53.91  |
| 6.25 | 4.63 | 29.087 | 34.2 | 53.959 |
| 6.24 | 4.61 | 29.085 | 34.2 | 54.75  |
| 6.24 | 4.59 | 29.083 | 34.2 | 54.752 |
| 6.24 | 4.57 | 29.08  | 34.2 | 54.76  |
| 6.23 | 4.56 | 29.079 | 34.2 | 54.82  |
| 6.22 | 4.54 | 29.078 | 34.2 | 55.759 |
| 6.22 | 4.52 | 29.076 | 34.2 | 55.795 |
| 6.22 | 4.51 | 29.075 | 34.2 | 55.794 |
| 6.22 | 4.5  | 29.075 | 34.2 | 55.889 |
| 6.21 | 4.48 | 29.073 | 34.3 | 56.027 |
| 6.21 | 4.46 | 29.072 | 34.3 | 56.108 |
| 6.21 | 4.44 | 29.072 | 34.3 | 56.932 |
| 6.2  | 4.42 | 29.072 | 34.3 | 56.951 |
| 6.2  | 4.4  | 29.071 | 34.3 | 56.955 |
| 6.19 | 4.39 | 29.071 | 34.3 | 57.007 |
| 6.19 | 4.38 | 29.07  | 34.4 | 57.163 |
| 6.19 | 4.37 | 29.069 | 34.4 | 57.264 |
| 6.19 | 4.33 | 29.068 | 34.6 | 57.335 |
| 6.2  | 4.25 | 29.068 | 34.7 | 57.295 |
| 6.22 | 4.22 | 29.069 | 34.7 | 57.338 |

|      |      |        |      |        |
|------|------|--------|------|--------|
| 6.23 | 4.26 | 29.07  | 34.6 | 57.438 |
| 6.25 | 4.29 | 29.069 | 34.6 | 57.534 |
| 6.25 | 4.29 | 29.069 | 35   | 57.585 |
| 6.35 | 4.24 | 29.068 | 36.6 | 57.611 |
| 6.38 | 3.89 | 29.067 | 39.8 | 57.626 |
| 6.39 | 3.66 | 29.068 | 44.4 | 57.684 |
| 6.41 | 3.54 | 29.069 | 47.8 | 57.742 |
| 6.41 | 3.59 | 29.071 | 48.4 | 57.744 |
| 6.42 | 3.65 | 29.074 | 47   | 57.743 |
| 6.42 | 3.77 | 29.077 | 45.2 | 57.743 |
| 6.41 | 3.73 | 29.075 | 43.5 | 57.735 |
| 6.41 | 3.63 | 29.074 | 42.4 | 57.709 |
| 6.52 | 3.54 | 29.071 | 42.2 | 57.68  |
| 6.59 | 2.31 | 29.068 | 43.5 | 57.67  |
| 6.58 | 1.32 | 29.065 | 46.7 | 57.664 |
| 6.58 | 1.08 | 29.063 | 50.7 | 57.654 |
| 6.59 | 1.55 | 29.066 | 50.7 | 57.642 |
| 6.59 | 1.04 | 29.07  | 50.7 | 57.648 |
| 6.58 | 0.76 | 29.07  | 52.4 | 57.659 |
| 6.57 | 0.66 | 29.069 | 55.7 | 57.673 |
| 6.55 | 0.59 | 29.068 | 57.7 | 57.689 |
| 6.52 | 0.49 | 29.065 | 61.4 | 57.69  |
| 6.5  | 0.42 | 29.064 | 63.7 | 57.69  |
| 6.49 | 0.71 | 29.067 | 60.6 | 57.691 |
| 6.58 | 1.12 | 29.077 | 58.2 | 57.697 |
| 6.53 | 0.57 | 29.082 | 59.6 | 57.699 |
| 6.52 | 0.46 | 29.082 | 64.9 | 57.703 |
| 6.51 | 0.41 | 29.079 | 66.7 | 57.702 |
| 6.5  | 0.36 | 29.079 | 65.5 | 57.692 |
| 6.49 | 0.32 | 29.082 | 63.5 | 57.687 |
| 6.48 | 0.3  | 29.085 | 64   | 57.698 |
| 6.47 | 0.28 | 29.086 | 66.2 | 57.709 |
| 6.46 | 0.72 | 29.085 | 67.7 | 57.703 |
| 6.77 | 0.8  | 29.08  | 69.7 | 57.695 |
| 6.84 | 1.44 | 29.074 | 66.2 | 57.683 |
| 6.72 | 2.38 | 29.068 | 56.5 | 57.665 |
| 6.7  | 2.06 | 29.067 | 44.3 | 57.668 |
| 6.72 | 2.41 | 29.066 | 44   | 57.666 |
| 6.72 | 2.67 | 29.065 | 43.8 | 57.694 |
| 6.72 | 3.44 | 29.067 | 40   | 57.711 |
| 6.72 | 3.64 | 29.068 | 37.4 | 57.75  |
| 6.61 | 3.69 | 29.067 | 38.2 | 57.833 |
| 6.58 | 3.69 | 29.066 | 40.5 | 57.924 |

108 Table S27 – P19 site depth profile from 2017 campaign.

| pH   | ODO mg/L | Temp °C | Cond µS/cm | Depth m |
|------|----------|---------|------------|---------|
| 6.52 | 5.2      | 29.431  | 34.5       | 0.344   |
| 6.52 | 5.2      | 29.432  | 34.5       | 0.388   |
| 6.52 | 5.19     | 29.43   | 34.4       | 0.43    |
| 6.52 | 5.19     | 29.428  | 34.3       | 0.494   |
| 6.51 | 5.19     | 29.429  | 34.2       | 0.548   |
| 6.51 | 5.18     | 29.43   | 34.2       | 0.619   |
| 6.51 | 5.18     | 29.432  | 34.1       | 0.677   |
| 6.51 | 5.18     | 29.44   | 34         | 0.752   |
| 6.51 | 5.18     | 29.45   | 33.9       | 0.837   |
| 6.51 | 5.19     | 29.459  | 33.8       | 0.914   |
| 6.51 | 5.19     | 29.458  | 33.7       | 0.982   |
| 6.51 | 5.19     | 29.458  | 33.7       | 1.045   |
| 6.51 | 5.19     | 29.458  | 33.7       | 1.106   |
| 6.51 | 5.19     | 29.459  | 33.6       | 1.171   |
| 6.51 | 5.18     | 29.457  | 33.6       | 1.246   |
| 6.51 | 5.18     | 29.457  | 33.5       | 1.322   |
| 6.51 | 5.18     | 29.452  | 33.5       | 1.39    |
| 6.51 | 5.18     | 29.446  | 33.5       | 1.475   |
| 6.51 | 5.18     | 29.437  | 33.5       | 1.575   |
| 6.5  | 5.18     | 29.434  | 33.5       | 1.659   |
| 6.5  | 5.18     | 29.432  | 33.4       | 1.755   |
| 6.49 | 5.17     | 29.432  | 33.4       | 1.832   |
| 6.5  | 5.17     | 29.433  | 33.4       | 1.923   |
| 6.5  | 5.17     | 29.437  | 33.4       | 2.004   |
| 6.5  | 5.17     | 29.44   | 33.5       | 2.08    |
| 6.5  | 5.17     | 29.44   | 33.5       | 2.147   |
| 6.5  | 5.17     | 29.435  | 33.5       | 2.222   |
| 6.5  | 5.17     | 29.43   | 33.5       | 2.289   |
| 6.51 | 5.17     | 29.428  | 33.5       | 2.352   |
| 6.51 | 5.17     | 29.432  | 33.5       | 2.433   |
| 6.51 | 5.17     | 29.433  | 33.6       | 2.507   |
| 6.5  | 5.17     | 29.429  | 33.6       | 2.589   |
| 6.5  | 5.17     | 29.42   | 33.6       | 2.682   |
| 6.49 | 5.17     | 29.414  | 33.6       | 2.778   |
| 6.49 | 5.16     | 29.412  | 33.7       | 2.873   |
| 6.49 | 5.16     | 29.414  | 33.7       | 2.961   |
| 6.5  | 5.16     | 29.415  | 33.7       | 3.042   |
| 6.5  | 5.16     | 29.415  | 33.8       | 3.12    |
| 6.51 | 5.16     | 29.417  | 33.8       | 3.201   |
| 6.51 | 5.16     | 29.419  | 33.8       | 3.293   |
| 6.5  | 5.16     | 29.417  | 33.9       | 3.408   |
| 6.5  | 5.16     | 29.414  | 33.9       | 4.269   |



|      |      |        |      |       |
|------|------|--------|------|-------|
| 6.49 | 5.16 | 29.412 | 33.9 | 4.424 |
| 6.49 | 5.16 | 29.412 | 34   | 4.503 |
| 6.48 | 5.16 | 29.412 | 34   | 4.588 |
| 6.48 | 5.16 | 29.412 | 34   | 4.659 |
| 6.48 | 5.16 | 29.412 | 34.1 | 4.782 |
| 6.48 | 5.16 | 29.413 | 34.1 | 4.867 |
| 6.47 | 5.16 | 29.414 | 34.1 | 4.974 |
| 6.47 | 5.16 | 29.415 | 34.2 | 5.062 |
| 6.48 | 5.16 | 29.415 | 34.2 | 5.232 |
| 6.48 | 5.16 | 29.415 | 34.2 | 5.397 |
| 6.48 | 5.16 | 29.415 | 34.2 | 5.561 |
| 6.48 | 5.16 | 29.415 | 34.3 | 5.703 |
| 6.48 | 5.16 | 29.414 | 34.3 | 5.836 |
| 6.48 | 5.16 | 29.412 | 34.3 | 5.969 |
| 6.48 | 5.15 | 29.413 | 34.3 | 6.107 |
| 6.48 | 5.15 | 29.413 | 34.4 | 6.233 |
| 6.48 | 5.15 | 29.414 | 34.4 | 7.064 |
| 6.49 | 5.15 | 29.414 | 34.4 | 7.166 |
| 6.49 | 5.15 | 29.414 | 34.4 | 7.266 |
| 6.49 | 5.15 | 29.414 | 34.4 | 7.353 |
| 6.5  | 5.15 | 29.414 | 34.4 | 7.454 |
| 6.5  | 5.15 | 29.413 | 34.5 | 7.516 |
| 6.49 | 5.15 | 29.412 | 34.5 | 7.601 |
| 6.49 | 5.15 | 29.413 | 34.5 | 8.45  |
| 6.48 | 5.14 | 29.413 | 34.5 | 8.558 |
| 6.48 | 5.14 | 29.413 | 34.5 | 8.638 |
| 6.48 | 5.14 | 29.412 | 34.5 | 8.777 |
| 6.48 | 5.14 | 29.411 | 34.6 | 8.901 |
| 6.49 | 5.14 | 29.412 | 34.6 | 9.042 |
| 6.49 | 5.14 | 29.412 | 34.6 | 9.893 |

109

110 Table S28 – P20 site depth profile from 2017 campaign.

| pH   | ODO mg/L | Temp °C | Cond µS/cm | Depth m |
|------|----------|---------|------------|---------|
| 7.01 | 7.98     | 30.036  | 37.5       | 0.433   |
| 7.03 | 7.98     | 30.034  | 37.5       | 0.523   |
| 7.04 | 7.98     | 30.033  | 37.6       | 0.617   |
| 7.05 | 7.98     | 30.032  | 37.6       | 0.719   |
| 7.06 | 7.98     | 30.032  | 37.6       | 0.822   |
| 7.07 | 7.98     | 30.032  | 37.6       | 0.92    |
| 7.07 | 7.99     | 30.033  | 37.6       | 1.012   |
| 7.08 | 7.99     | 30.033  | 37.6       | 1.098   |
| 7.08 | 7.99     | 30.034  | 37.5       | 1.185   |

|      |      |        |      |       |
|------|------|--------|------|-------|
| 7.08 | 8    | 30.034 | 37.5 | 1.279 |
| 7.09 | 8    | 30.036 | 37.5 | 1.378 |
| 7.09 | 8    | 30.037 | 37.4 | 1.469 |
| 7.09 | 8    | 30.035 | 37.3 | 1.56  |
| 7.09 | 8    | 30.029 | 37.2 | 1.653 |
| 7.09 | 8    | 30.027 | 37.2 | 1.743 |
| 7.09 | 8    | 30.026 | 37.1 | 1.832 |
| 7.09 | 8    | 30.026 | 37   | 1.919 |
| 7.09 | 8    | 30.026 | 36.9 | 1.986 |
| 7.09 | 8    | 30.027 | 36.9 | 2.039 |
| 7.09 | 8    | 30.028 | 36.8 | 2.101 |
| 7.09 | 8    | 30.027 | 36.8 | 2.162 |
| 7.09 | 8.01 | 30.025 | 36.8 | 2.236 |
| 7.09 | 8.01 | 30.024 | 36.7 | 2.332 |
| 7.09 | 8    | 30.024 | 36.7 | 2.415 |
| 7.09 | 8    | 30.024 | 36.7 | 2.508 |
| 7.09 | 8    | 30.023 | 36.7 | 2.63  |
| 7.09 | 8    | 30.023 | 36.7 | 2.767 |
| 7.09 | 8    | 30.023 | 36.7 | 2.921 |
| 7.09 | 8.01 | 30.023 | 36.7 | 3.77  |
| 7.09 | 8.01 | 30.023 | 36.7 | 3.916 |
| 7.09 | 8    | 30.023 | 36.7 | 3.944 |
| 7.09 | 8    | 30.024 | 36.7 | 4.001 |
| 7.08 | 8.01 | 30.025 | 36.7 | 4.045 |
| 7.08 | 8.01 | 30.027 | 36.8 | 4.086 |
| 7.08 | 8.01 | 30.03  | 36.8 | 4.137 |
| 7.08 | 8.01 | 30.033 | 36.8 | 4.189 |
| 7.08 | 8.02 | 30.034 | 36.8 | 4.241 |
| 7.09 | 8.02 | 30.033 | 36.9 | 4.345 |
| 7.09 | 8.02 | 30.031 | 36.9 | 4.443 |
| 7.09 | 8.01 | 30.031 | 36.9 | 4.539 |
| 7.09 | 8.01 | 30.03  | 37   | 4.635 |
| 7.09 | 8.01 | 30.029 | 37   | 4.722 |
| 7.09 | 8.01 | 30.026 | 37   | 4.803 |
| 7.09 | 8.01 | 30.025 | 37.1 | 4.891 |
| 7.09 | 8.01 | 30.024 | 37.1 | 4.966 |
| 7.08 | 8.02 | 30.024 | 37.2 | 5.054 |
| 7.08 | 8.02 | 30.025 | 37.2 | 5.145 |
| 7.08 | 8.01 | 30.026 | 37.3 | 5.272 |
| 7.08 | 8.01 | 30.026 | 37.3 | 6.297 |
| 7.08 | 8.02 | 30.025 | 37.3 | 6.392 |
| 7.08 | 8.02 | 30.027 | 37.4 | 6.333 |
| 7.09 | 8.02 | 30.029 | 37.4 | 6.317 |
| 7.09 | 8.02 | 30.028 | 37.5 | 6.318 |
| 7.09 | 8.02 | 30.025 | 37.5 | 6.33  |

|      |      |        |      |        |
|------|------|--------|------|--------|
| 7.09 | 8.02 | 30.024 | 37.5 | 6.354  |
| 7.09 | 8.02 | 30.023 | 37.6 | 6.382  |
| 7.1  | 8.02 | 30.025 | 37.6 | 6.415  |
| 7.1  | 8.02 | 30.025 | 37.7 | 6.457  |
| 7.09 | 8.02 | 30.025 | 37.7 | 6.494  |
| 7.09 | 8.02 | 30.025 | 37.7 | 6.51   |
| 7.1  | 8.02 | 30.026 | 37.7 | 6.509  |
| 7.1  | 8.02 | 30.027 | 37.8 | 6.498  |
| 7.1  | 8.03 | 30.025 | 37.8 | 6.523  |
| 7.1  | 8.02 | 30.023 | 37.8 | 6.594  |
| 7.09 | 8.02 | 30.021 | 37.9 | 6.68   |
| 7.09 | 8.02 | 30.022 | 37.9 | 7.487  |
| 7.09 | 8.02 | 30.023 | 37.9 | 7.491  |
| 7.09 | 8.02 | 30.022 | 37.9 | 7.581  |
| 7.09 | 8.02 | 30.021 | 37.9 | 7.714  |
| 7.09 | 8.02 | 30.02  | 38   | 7.822  |
| 7.1  | 8.01 | 30.02  | 38   | 7.893  |
| 7.1  | 8.01 | 30.02  | 38   | 7.947  |
| 7.1  | 8.01 | 30.02  | 38   | 8.004  |
| 7.1  | 8.01 | 30.02  | 38   | 8.129  |
| 7.1  | 8.01 | 30.02  | 38.1 | 8.274  |
| 7.1  | 8.01 | 30.02  | 38.1 | 8.382  |
| 7.1  | 8.01 | 30.021 | 38.1 | 8.461  |
| 7.09 | 8.01 | 30.021 | 38.1 | 8.552  |
| 7.08 | 8.01 | 30.019 | 38.1 | 8.656  |
| 7.07 | 8    | 30.016 | 38.1 | 8.777  |
| 7.06 | 8    | 30.015 | 38.1 | 8.895  |
| 7.05 | 8    | 30.014 | 38.1 | 9      |
| 7.05 | 8    | 30.013 | 38.1 | 9.11   |
| 7.05 | 8    | 30.012 | 38.1 | 9.233  |
| 7.06 | 8    | 30.011 | 38.1 | 9.369  |
| 7.07 | 7.99 | 30.012 | 38.1 | 9.496  |
| 7.07 | 7.99 | 30.011 | 38.1 | 9.632  |
| 7.06 | 7.99 | 30.011 | 38.2 | 9.753  |
| 7.05 | 7.99 | 30.012 | 38.2 | 9.872  |
| 7.04 | 8    | 30.014 | 38.2 | 10.008 |
| 7.03 | 8    | 30.015 | 38.2 | 10.144 |
| 7.02 | 8    | 30.014 | 38.2 | 10.268 |
| 7.01 | 8    | 30.014 | 38.2 | 10.383 |
| 7    | 7.99 | 30.014 | 38.2 | 10.487 |
| 6.99 | 7.99 | 30.013 | 38.2 | 10.595 |
| 6.97 | 7.99 | 30.014 | 38.2 | 10.717 |
| 6.95 | 7.99 | 30.016 | 38.2 | 10.86  |
| 6.93 | 7.99 | 30.018 | 38.2 | 11.676 |
| 6.92 | 7.99 | 30.018 | 38.2 | 11.754 |

|      |      |        |      |        |
|------|------|--------|------|--------|
| 6.91 | 7.99 | 30.017 | 38.2 | 11.815 |
| 6.89 | 7.99 | 30.016 | 38.2 | 11.846 |
| 6.88 | 7.99 | 30.017 | 38.2 | 11.916 |
| 6.86 | 7.99 | 30.017 | 38.2 | 11.989 |
| 6.84 | 7.99 | 30.017 | 38.2 | 12.069 |
| 6.82 | 7.98 | 30.016 | 38.2 | 12.137 |
| 6.81 | 7.98 | 30.016 | 38.2 | 12.246 |
| 6.79 | 7.98 | 30.015 | 38.2 | 12.365 |
| 6.78 | 7.98 | 30.014 | 38.2 | 12.501 |
| 6.76 | 7.98 | 30.014 | 38.2 | 12.646 |
| 6.75 | 7.98 | 30.015 | 38.2 | 12.788 |
| 6.73 | 7.98 | 30.015 | 38.2 | 12.929 |
| 6.71 | 7.98 | 30.014 | 38.2 | 13.05  |
| 6.7  | 7.98 | 30.012 | 38.2 | 13.18  |
| 6.68 | 7.97 | 30.011 | 38.2 | 13.308 |
| 6.67 | 7.97 | 30.012 | 38.2 | 13.428 |
| 6.66 | 7.97 | 30.011 | 38.3 | 13.54  |
| 6.66 | 7.97 | 30.012 | 38.3 | 13.646 |
| 6.66 | 7.97 | 30.012 | 38.2 | 13.75  |
| 6.67 | 7.96 | 30.012 | 38.2 | 13.851 |
| 6.67 | 7.96 | 30.013 | 38.2 | 13.953 |
| 6.66 | 7.96 | 30.014 | 38.3 | 14.049 |
| 6.66 | 7.96 | 30.014 | 38.3 | 14.726 |
| 6.65 | 7.96 | 30.013 | 38.3 | 14.87  |
| 6.63 | 7.97 | 30.013 | 38.3 | 14.991 |
| 6.61 | 7.97 | 30.012 | 38.3 | 15.089 |
| 6.6  | 7.97 | 30.012 | 38.3 | 15.178 |
| 6.58 | 7.97 | 30.01  | 38.3 | 15.24  |
| 6.56 | 7.97 | 30.01  | 38.3 | 15.331 |
| 6.54 | 7.97 | 30.01  | 38.3 | 15.418 |
| 6.53 | 7.97 | 30.012 | 38.3 | 15.528 |
| 6.52 | 7.97 | 30.014 | 38.3 | 15.691 |
| 6.51 | 7.97 | 30.015 | 38.3 | 16.65  |
| 6.5  | 7.97 | 30.016 | 38.3 | 16.851 |
| 6.49 | 7.97 | 30.016 | 38.3 | 16.996 |
| 6.47 | 7.96 | 30.016 | 38.3 | 17.122 |
| 6.47 | 7.96 | 30.017 | 38.3 | 17.231 |
| 6.46 | 7.96 | 30.017 | 38.3 | 18.169 |
| 6.45 | 7.95 | 30.016 | 38.3 | 18.384 |
| 6.45 | 7.95 | 30.015 | 38.3 | 18.51  |
| 6.44 | 7.95 | 30.014 | 38.3 | 18.638 |
| 6.43 | 7.95 | 30.014 | 38.3 | 18.734 |
| 6.43 | 7.95 | 30.014 | 38.3 | 18.824 |
| 6.43 | 7.95 | 30.015 | 38.3 | 18.91  |
| 6.43 | 7.95 | 30.015 | 38.3 | 18.977 |

112 Table S29 – P21 site depth profile from 2017 campaign.

| pH   | ODO mg/L | Temp °C | Cond $\mu$ S/cm | Depth m |
|------|----------|---------|-----------------|---------|
| 6.83 | 6.85     | 30.073  | 36.7            | 0.117   |
| 6.82 | 6.87     | 30.074  | 36.6            | 0.161   |
| 6.81 | 6.88     | 30.082  | 36.5            | 0.207   |
| 6.82 | 6.89     | 30.08   | 36.4            | 0.246   |
| 6.81 | 6.89     | 30.073  | 36.3            | 0.269   |
| 6.81 | 6.89     | 30.071  | 36.2            | 0.296   |
| 6.81 | 6.88     | 30.066  | 36.1            | 0.329   |
| 6.81 | 6.87     | 30.053  | 36.1            | 0.362   |
| 6.81 | 6.86     | 30.036  | 36              | 0.419   |
| 6.81 | 6.86     | 30.031  | 35.9            | 0.505   |
| 6.81 | 6.86     | 30.031  | 35.9            | 0.604   |
| 6.81 | 6.86     | 30.025  | 35.8            | 0.718   |
| 6.81 | 6.86     | 30.017  | 35.8            | 0.843   |
| 6.81 | 6.86     | 30.015  | 35.8            | 0.985   |
| 6.81 | 6.86     | 30.013  | 35.7            | 1.137   |
| 6.81 | 6.86     | 30.011  | 35.7            | 1.298   |
| 6.8  | 6.86     | 30.008  | 35.7            | 1.44    |
| 6.8  | 6.85     | 30.006  | 35.7            | 1.577   |
| 6.8  | 6.85     | 30.004  | 35.7            | 1.714   |
| 6.8  | 6.85     | 30.002  | 35.7            | 1.844   |
| 6.8  | 6.85     | 30.001  | 35.7            | 1.97    |
| 6.8  | 6.84     | 30.001  | 35.7            | 2.083   |
| 6.81 | 6.84     | 30.002  | 35.7            | 2.199   |
| 6.81 | 6.84     | 30.004  | 35.8            | 2.321   |
| 6.8  | 6.84     | 30.001  | 35.8            | 2.446   |
| 6.8  | 6.84     | 29.997  | 35.8            | 3.399   |
| 6.8  | 6.84     | 29.997  | 35.8            | 3.577   |
| 6.8  | 6.84     | 29.999  | 35.9            | 3.573   |
| 6.79 | 6.84     | 30      | 35.9            | 3.625   |
| 6.79 | 6.84     | 29.999  | 35.9            | 3.699   |
| 6.78 | 6.84     | 29.998  | 35.9            | 3.772   |
| 6.78 | 6.84     | 29.996  | 36              | 3.847   |
| 6.78 | 6.84     | 29.994  | 36              | 3.929   |
| 6.78 | 6.84     | 29.993  | 36.1            | 4.026   |
| 6.78 | 6.83     | 29.992  | 36.1            | 4.735   |
| 6.78 | 6.83     | 29.992  | 36.1            | 4.741   |
| 6.78 | 6.83     | 29.992  | 36.2            | 4.753   |
| 6.78 | 6.83     | 29.992  | 36.2            | 4.776   |
| 6.79 | 6.83     | 29.997  | 36.2            | 4.824   |

|      |      |        |      |       |
|------|------|--------|------|-------|
| 6.79 | 6.82 | 29.998 | 36.3 | 4.904 |
| 6.79 | 6.82 | 29.998 | 36.3 | 4.992 |
| 6.79 | 6.82 | 29.998 | 36.3 | 5.766 |
| 6.8  | 6.81 | 30     | 36.4 | 5.884 |
| 6.8  | 6.81 | 29.998 | 36.4 | 5.855 |
| 6.8  | 6.81 | 29.994 | 36.5 | 5.938 |
| 6.8  | 6.81 | 29.992 | 36.5 | 6.017 |
| 6.8  | 6.81 | 29.992 | 36.5 | 6.104 |
| 6.8  | 6.81 | 29.992 | 36.5 | 6.191 |
| 6.8  | 6.81 | 29.991 | 36.6 | 6.276 |
| 6.8  | 6.8  | 29.991 | 36.6 | 6.351 |
| 6.8  | 6.8  | 29.991 | 36.6 | 6.485 |
| 6.8  | 6.8  | 29.99  | 36.7 | 6.622 |
| 6.8  | 6.8  | 29.99  | 36.7 | 6.737 |
| 6.79 | 6.8  | 29.99  | 36.7 | 6.877 |
| 6.78 | 6.8  | 29.99  | 36.7 | 7.778 |
| 6.77 | 6.8  | 29.99  | 36.8 | 7.857 |
| 6.77 | 6.8  | 29.99  | 36.8 | 7.942 |
| 6.77 | 6.8  | 29.99  | 36.8 | 8.071 |
| 6.77 | 6.8  | 29.99  | 36.8 | 8.191 |
| 6.77 | 6.79 | 29.99  | 36.8 | 8.255 |
| 6.77 | 6.8  | 29.99  | 36.8 | 8.313 |
| 6.77 | 6.8  | 29.99  | 36.8 | 8.334 |
| 6.77 | 6.81 | 29.99  | 36.9 | 8.341 |
| 6.77 | 6.82 | 29.99  | 36.9 | 8.377 |
| 6.78 | 6.83 | 29.991 | 36.9 | 8.397 |
| 6.77 | 6.83 | 29.99  | 36.9 | 8.38  |
| 6.77 | 6.83 | 29.99  | 36.9 | 8.349 |
| 6.77 | 6.83 | 29.99  | 36.9 | 8.317 |
| 6.76 | 6.82 | 29.99  | 36.9 | 8.279 |
| 6.76 | 6.81 | 29.989 | 36.9 | 8.271 |
| 6.76 | 6.8  | 29.989 | 36.9 | 8.299 |
| 6.75 | 6.79 | 29.989 | 36.9 | 8.363 |

113

114

115

116

117

118

119 3.  $k_{600}$  correlation scatterplots

120

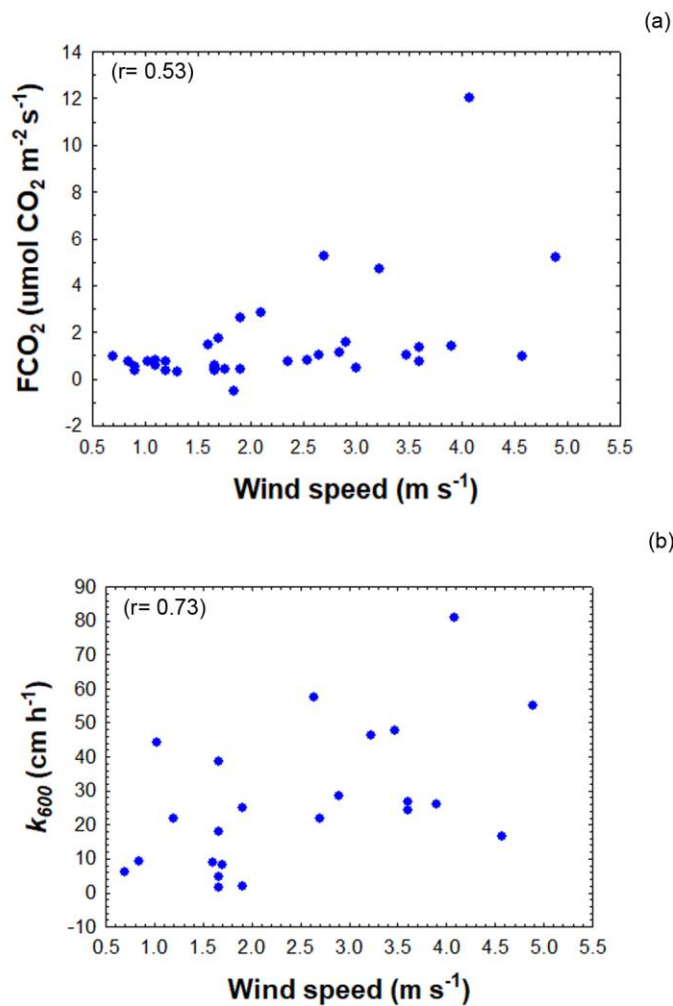

121

122 Fig.1: Scatterplots between FCO<sub>2</sub> (A) and  $k_{600}$  (B) as a function of wind speed. Values from  
123 figure 5 (A) include high and low water seasons. Figure 5 (B) comprises only high water values  
124 for statistical correlation (Spearman correlation). Rho values are located on each image left  
125 superior side.
